# Supplementary material for: Microsatellite frequencies vary with body mass and body temperature in mammals, suggesting correlated variation in mutation rate
Source: PeerJ. 2014 Nov 6;2:e663. doi: 10.7717/peerj.663 (PMC4226647; doi:10.7717/peerj.663)
Supplement: Table S1 — Columns are as labelled apart from ‘Clade’ which is the major grouping used for phenotype prediction. Given their radically different lifestyle, we separate Cetaceans from Cetartiodactyla, though results are essentially identical if this separation is not made. Columns ‘body temperature’ and ‘log10 (Mass), Kg’ give the phenotype estimates used in the current study. Sources are coded by number and listed to the right of the data. [file peerj-02-663-s001.xlsx]

## Sheet: Sheet1
Species	Common name	Clade	Database	Version of genome	Body Temperature	Source	log10(Mass), Kg	Source
Bos taurus	cow	Catartiodactyla	NCBI	Btau_4.6.1	38.4	1	2.54407	1		1	Clarke A., Rothery P. 2008 Scaling of body temperature in mammals and birds. Functional Ecol 22(1), 58-67.
Bos grunniens	yak	Catartiodactyla	NCBI	BosGru_v2.0	38	3	2.8451	2		2	http://animaldiversity.ummz.umich.edu
Capra hircus	goat	Catartiodactyla	NCBI	CHIR_1.0	39.5	1	1.255	1		3	http://genomics.senescence.info
Ovis aries	sheep	Catartiodactyla	UCSC	OviAri3	39.4	1	1.39794	1		4	http://www.ccac.ca/Documents/Standards/Guidelines/Vol2/hamsters.pdf
Pantholops hodgsonii	chiru	Catartiodactyla	NCBI	PHO1.0	39	6	1.54	2		5	http://www.savethechimps.org/chimp-facts
Tusiops truncatus	bottlenose dolphin	Cetacean	UCSC	turTru2	36.3	8	2.65321	3		6	estimated
Orcinus orca	killer whale	Cetacean	NCBI	Oorc1.1	36	3	3.8451	3		7	http://eol.org/
Sus scrofa	pig	Catartiodactyla	UCSC	susScr3	38.8	3	1.95424	3		8	Hampton I.F.G., Whittow G.C., Szekerczes J., Rutherford S. 1971 Heat transfer and body temperature in the Atlantic bottlenose dolphin, Tursiops truncatus. Int J Biometeor 15, 247-253.
Camelus ferus	camel	Catartiodactyla	NCBI	CB1	37.2	1	2.65321	1		9	Perth Zoo, pers. communication
Vicugna pacos	alpaca	Cetartiodactyla	UCSC	vicPac2	39.3	3	1.90309	3		10	Huang X., Zhang Z., Wang C., Lan J., Li M., Hou R. 2011 Successful rearing of a giant panda cub with low birth weight. Acta Ther Sin 31, 113-116.
Equus caballus	horse	Perissodactyl	NCBI	EquCab2.0	38.3	3	2.60206	3		11	Hill R.D., Schneider R.C., Liggins G.C., Schuette A.H., Elliott R.L., Guppy M., Hochachka P.W., Qvist J., Falke K.J., Zapol W.M. 1987 Heart rate and body temperature during free diving of Weddell seals. Am J Physiol 253, R344-351.
Ceratotherium simum simum	white rhinocerus	Perissodactyl	UCSC	cerSim1	35.2	1	2.47712	1		12	Fahlman D.V.M., Bosi E.J., Nyman G. 2006 Reversible anesthesia of southeast Asian primates with medetomidine, zolazepam and tiletamine. J Zoo Wildlife Med 37(4), 558-561.
Myotis davidii	David's myotis	Chiroptera	NCBI	ASM32734v1	35	6	-2.4	6		13	Rommel S.A., Pabst D.A., McLellan W.A. 2001 Functional morphology of venous structures associated with the male and female reproductive systems in Florida manatees (Trichetus manatus latirostris i). Anat Rec 264, 339-347.
Myotis lucifugus	little brown bat	Chiroptera	UCSC	myoLuc2	37.2	1	-2.04576	1		14	http://en.wikipedia.org/wiki/Human_body_temperature
Myotis brandtii	Brandt's myotis	Chiroptera	NCBI	ASM41265v1	35	6	-2.09691	7
Eptesicus fuscus	bid brown bat	Chiroptera	NCBI	EptFus1.0	36	1	-2	1
Pteropus vampyrus	large flying fox	Chiroptera	UCSC	pteVam1	36.9	1	0.0103	1
Pteropus alecto	black flying fox	Chiroptera	NCBI	ASM32557v1	35.9	6	-0.124939	3
Leptonychotes weddellii	Weddell seal	Carnivora	NCBI	LepWed1.0	37.3	11	2.60206	3
Odobenus rosmarus divergens	Pacific walrus	Carnivora	NCBI	Oros_1.0	36.4	1	3.02531	1
Ailuropoda melanoleuca	giant panda	Carnivora	UCSC	ailMel1	38.9	10	2.04139	2
Mustela putorius furo	ferret	Carnivora	UCSC	musFur1	39.5	1	-0.869666	1
Canis familiaris	dog	Carnivora	UCSC	canFam3	38.4	1	1.60206	1
Felis catus	cat	Carnivora	UCSC	felCat5	38.1	3	0.69897	3
Erinaceus europaeus	hedgehog	Insectivore	UCSC	eriEur1	35.6	1	-0.102373	1
Cndylura cristata	star-nosed mole	Insectivore	NCBI	ConCri1.0	37.7	1	-1.3098	1
Sorex araneus	shrew	Insectivore	UCSC	sorAra1	38.3	3	-2	3
Pan paniscus	bonobo	Primate	NCBI	panpan1	35.7	5	1.54407	2
Pan troglodytes	chimpanzee	Primate	NCBI	Pan_trogladytes-2.1.4	35.7	3	1.65321	2
Homo sapiens	human	Primate	NCBI	GRCh37.p13	37	14	1.8451	6
Gorilla gorilla	gorilla	Primate	NCBI	gorGor3.1	35.5	3	2.14613	3
Pongo abelii	orangutan	Primate	UCSC	ponAbe2	37.1	12	1.87506	2
Nomascus leucogenys	white-cheeked gibbon	Primate	UCSC	nomLeu3	39	9	0.755875	3
Macaca mulatta	Rhesus monkey	Primate	NCBI	Mmul_051212	39.3	1	0.69897	1
Macaca fascicularis	crab-eating macaque	Primate	NCBI	macaca_fascicularis_5.0	37.6	3	0.845098	3
Papia anubis	baboon	Primate	UCSC	papAnu2	37.3	1	0.977	1
Callithrix jacchus	white-tufted-ear marmoset	Primate	UCSC	calJac3	36	3	-0.605548	2
Saimiri boliviensis boliviensis	Bolivian squirrel monkey	Primate	UCSC	saiBol1	38	1	-0.0579919	1
Tarsius syrichta	Phillipine tarsier	Primate	UCSC	tarSyr1	33.8	1	-0.946922	1
Microcebus murinus	mouse lemur	Primate	UCSC	micMur1	36.1	1	-0.950782	1
Otolemur garnetti	small-eared galego	Primate	NCBI	OtoGar3	36	3	-0.119186	3
Cricetulus griseus	Chinese hamster	Rodent	NCBI	CriGri1.0	39.5	4	-0.443697	4
Mesocricetus auratus	golden hamster	Rodent	NCBI	MesAur1.0	38.1	1	-1.00877	1
Microtus ochrogaster	prairies vole	Rodent	NCBI	MichOch1.0	37.9	1	-1.33	1
Mus musculus	house mouse	Rodent	NCBI	GRCm38.p1	36.7	1	-1.33724	1
Rattus norvegicus	rat	Rodent	UCSC	rn5	37.2	1	-0.457175	1
Jaculus jaculus	lesser Egyptian jerboa	Rodent	NCBI	JacJac1.0	37.5	1	-1.12494	1
Dipodomys ordii	Ord's kangaroo rat	Rodent	UCSC	dipOrd1	34.6	1	-1.3279	1
Chinchilla lanigera	long-tailed chinchilla	Rodent	NCBI	ChiLan1.0	34.7	1	-0.323306	1
Octodon degus	degu	Rodent	NCBI	OctDeg1.0	37.6	1	-0.714443	1
Cavia procellus	guinea pig	Rodent	UCSC	cavPor3	39	1	-0.200659	1
Heterocephalus glaber	naked mole rat	Rodent	NCBI	HetGla_1.0	32.1	1	-1.49485	1
Spermophilus tridecemlineatus	thirteen-banded ground squirrel	Rodent	NCBI	SpeTri2.0	35.7	1	-0.6874	1
Ochotona princeps	pika	Rodent	UCSC	ochPri2	40.1	1	-0.962574	1
Oryctolagus cuniculus	rabbit	Rodent	NCBI	OryCun2.0	39	3	0.30103	3
Tupaia belangeri	tree shrew	Rodent	UCSC	tupBel1	37	3	-0.910095	3
Chrysochloris asiatica	Cape golden mole	Afrotheria	NCBI	ChrAsi1.0	34	2	-1.35655	2
Echinops telfairi	small Madagascar hedgehog	Afrotheria	NCBI	EchTel2.0	34.7	3	-0.744727	3
Elephantulus edwardii	Cape elephant shrew	Afrotheria	NCBI	EleEdw1.0	37.6	1	-1.30103	1
Orycteropus afer	aardvark	Afrotheria	NCBI	OryAfe1.0	34.5	1	1.68124	1
Procavia capensis	Cape rock hyrax	Afrotheria	NCBI	Procap1.0	37	1	0.380211	1
Loxodonta africana	African elephant	Afrotheria	UCSC	loxAfr3	36.2	1	3.73878	1
Trichechus manatus latirostris	Florida manatee	Afrotheria	UCSC	triMan1	36.4	13	2.60206	3
Dasypus novencinctus	nine-banded armadillo	Edentate	UCSC	dasNov3	34.5	1	0.545307	1
Choloepus hoffmanii	Hoffmann's two-fingered sloth	Edentate	UCSC	choHof1	34.4	1	0.579784	1
Macropus eugenii	tammar wallaby	Marsupial	UCSC	macEug2	36.5	1	0.68842	1
Sarcophilus harrisii	Tasmanian devil	Marsupial	UCSC	sarHar1	34.9	1	0.880814	1
Monodelphis domestica	grey short-tailed possum	Marsupial	UCSC	MonDom5	32.6	1	-0.982967	1
Ornithorhynchus anatinus	duck-billed platypus	Monotreme	NCBI	Ornithorhynchus_anatinus-5.0.1	32.1	1	0.120574	1
