# Supplementary material for: Microsatellite frequencies vary with body mass and body temperature in mammals, suggesting correlated variation in mutation rate
Source: PeerJ. 2014 Nov 6;2:e663. doi: 10.7717/peerj.663 (PMC4226647; doi:10.7717/peerj.663)
Supplement: Table S2 — Data are presented for 69 species of mammal for AT, AC and AG, and for ATT, AAC and AGG. Counts are given for the range four to 30 repeats, expressed as log10 ((counts + 1)/number of bases assayed). GC content is given for each species in the top panel. [file peerj-02-663-s002.xlsx]

## Sheet: Sheet1
The full names of species are given in Table S1
All microsatellite frequencies are calculated as LOG10((N+1)/Nbases), where N = microsatellite count and Nbases is the number of qualifying bases screened
Species	pGC	AT4	AT5	AT6	AT7	AT8	AT9	AT10	AT11	AT12	AT13	AT14	AT15	AT16	AT17	AT18	AT19	AT20	AT21	AT22	AT23	AT24	AT25	AT26	AT27	AT28	AT29	AT30
AME	0.416152	-9.49709	-11.0609	-11.9542	-12.5411	-13.0614	-13.4859	-13.8166	-14.4045	-15.1537	-15.2919	-16.4262	-17.0213	-17.748	-18.1309	-18.0982	-18.4411	-18.8241	-18.8241	-20.1459	-19.9227	-20.839	-19.9227	-20.4335	-19.7404	-19.9227	-20.4335	-20.4335
BGR	0.417165	-9.37105	-10.8977	-11.6417	-12.0711	-12.4581	-12.835	-13.1753	-13.6084	-13.8851	-14.3858	-14.8125	-15.1575	-15.3864	-15.6862	-15.973	-16.2653	-16.6458	-17.128	-16.9863	-17.6425	-18.0389	-18.3176	-18.8166	-19.0848	-18.7594	-19.2519	-19.4526
BTA	0.418736	-9.3502	-10.9437	-11.7049	-12.2308	-12.6534	-13.0405	-13.3849	-13.7007	-13.941	-14.1256	-14.2849	-14.3448	-14.4189	-14.4794	-14.5327	-14.573	-14.662	-14.7479	-14.9411	-15.3543	-15.6792	-16.0441	-16.3933	-16.7987	-17.0911	-17.9259	-18.0657
CAS	0.400152	-9.66625	-11.0842	-11.7666	-12.2647	-12.7092	-13.1601	-13.6965	-14.1424	-14.5382	-14.8572	-15.1912	-15.4084	-15.5908	-15.7815	-15.9806	-16.2596	-16.2874	-16.5292	-16.6789	-16.9876	-17.4366	-17.4038	-17.8093	-18.0244	-18.41	-18.2475	-18.8454
CCR	0.415483	-9.46172	-10.9165	-11.6144	-12.0931	-12.522	-12.9349	-13.3389	-13.6639	-13.8634	-14.0567	-14.197	-14.3622	-14.5055	-14.7289	-14.9651	-14.9821	-15.2057	-15.4816	-15.8409	-16.0846	-16.2808	-16.4561	-16.8128	-16.9809	-17.2733	-17.606	-17.7172
CFA	0.411017	-9.38177	-10.8653	-11.7097	-12.3232	-12.7896	-13.2619	-13.641	-14.0253	-14.3205	-14.5309	-14.7724	-14.9073	-14.9098	-14.9186	-14.9011	-14.7329	-14.5534	-14.4505	-14.4916	-14.7298	-15.1095	-15.4494	-15.9826	-16.2776	-16.8508	-17.2782	-17.6837
CFE	0.412783	-9.41496	-10.6973	-11.5223	-12.1452	-12.6507	-13.1723	-13.7369	-14.2292	-14.6675	-15.3067	-15.7256	-16.1943	-16.7458	-17.1326	-17.538	-17.9752	-18.4648	-18.7012	-19.212	-19.6175	-20.7161	-20.7161	-20.0229	-20.0229	-20.7161	-20.3106	-20.3106
CGR	0.414002	-9.79502	-11.5182	-12.3324	-12.7464	-13.032	-13.3338	-13.6736	-13.9344	-14.093	-14.2131	-14.2671	-14.2463	-14.2563	-14.1784	-14.1027	-14.0371	-13.8164	-13.9123	-14.8435	-15.7359	-16.1443	-16.6449	-17.2082	-17.9814	-18.269	-18.346	-19.2623
CHI	0.418238	-9.3758	-10.8535	-11.5693	-12.1234	-12.5855	-13.0633	-13.4323	-13.7273	-14.0832	-14.2881	-14.579	-14.7289	-14.844	-15.0159	-15.5117	-15.9315	-16.1132	-16.268	-16.5824	-17.2692	-17.2819	-17.7885	-18.1123	-18.2713	-18.6429	-18.866	-19.336
CHO	0.389491	-9.4924	-11.0887	-11.9748	-12.605	-13.18	-13.673	-14.0651	-14.4273	-14.6082	-14.8927	-14.9883	-15.2221	-15.1986	-15.3441	-15.4232	-15.416	-15.5277	-15.404	-15.4934	-15.7907	-16.2819	-16.3108	-16.8415	-17.0399	-17.17	-17.3035	-17.8631
CJA	0.409111	-9.35898	-10.8621	-11.6606	-12.2414	-12.7561	-13.246	-13.5905	-13.9162	-14.1973	-14.493	-14.7576	-14.8626	-15.0326	-14.9789	-15.0289	-15.1861	-15.1776	-15.1386	-15.3223	-15.6559	-16.1674	-16.4888	-17.0173	-17.3663	-17.9746	-18.5577	-18.6447
CLA	0.41065	-9.61614	-11.1341	-11.9143	-12.4884	-12.9624	-13.4261	-13.8766	-14.2176	-14.4727	-14.6426	-14.7672	-14.7901	-14.9082	-14.9646	-15.0127	-15.102	-15.2072	-15.4203	-15.7145	-16.1603	-16.5059	-17.072	-17.7881	-17.8117	-18.4139	-18.4139	-19.0644
CPO	0.399486	-9.65268	-11.5139	-12.3139	-12.7885	-13.1735	-13.4982	-13.7012	-13.8748	-13.9159	-14.0008	-13.9962	-13.9635	-13.8037	-13.631	-13.5472	-13.4879	-13.4667	-13.6149	-14.0395	-15.0083	-15.9695	-16.8353	-17.6085	-18.5248	-19.4003	-20.0934	-20.6042
CSI	0.408951	-9.38934	-10.9347	-11.8315	-12.5638	-13.246	-13.8329	-14.2512	-14.6573	-15.0865	-15.4493	-15.7099	-15.801	-16.0877	-16.2425	-16.4609	-16.615	-17.031	-16.9501	-17.4104	-17.7136	-18.0295	-18.2175	-19.0199	-19.7931	-19.2822	-19.3876	-19.7931
DNO	0.407752	-9.37674	-11.01	-11.7302	-12.4026	-12.9997	-13.5379	-13.9953	-14.4452	-14.7935	-15.0358	-15.2786	-15.4826	-15.6091	-15.8191	-15.8745	-15.8793	-16.0882	-16.0564	-16.2404	-16.4037	-16.6089	-16.6442	-17.0889	-17.2728	-17.4513	-17.9853	-18.4207
DOR	0.423844	-9.52613	-11.0921	-11.7876	-12.1663	-12.4221	-12.6555	-12.936	-13.18	-13.3767	-13.4762	-13.653	-13.7578	-13.8538	-13.9708	-14.0896	-14.1798	-14.3095	-14.4484	-14.5549	-14.782	-14.9991	-15.2722	-15.3029	-15.6661	-15.8637	-16.1598	-16.4307
ECA	0.413552	-9.54075	-11.1496	-12.0714	-12.7271	-13.2961	-13.7657	-14.1303	-14.5074	-14.8596	-14.9761	-15.246	-15.3191	-15.5423	-15.5354	-15.7414	-15.855	-15.7585	-16.0235	-16.2354	-16.6762	-17.0568	-17.5503	-18.0272	-18.3918	-18.9027	-19.4135	-19.8189
EED	0.402975	-9.80008	-11.5417	-12.4046	-12.9631	-13.506	-13.9811	-14.4518	-14.8868	-15.2337	-15.4088	-15.6663	-15.8513	-16.0814	-16.1663	-16.3089	-16.5194	-16.7126	-16.8916	-17.1947	-17.3371	-17.6454	-17.8967	-17.9708	-18.5898	-19.0317	-18.4563	-19.0317
EEU	0.415394	-9.37141	-10.5233	-11.1996	-11.6904	-12.0741	-12.4682	-12.7761	-13.1027	-13.2865	-13.4884	-13.6281	-13.7716	-13.8394	-13.9318	-14.0162	-14.1112	-14.2427	-14.3378	-14.5265	-14.8527	-15.1248	-15.4657	-15.7867	-16.0175	-16.2772	-16.7342	-17.1397
EFU	0.429323	-9.33076	-10.7889	-11.6525	-12.3279	-12.9464	-13.4822	-14.0506	-14.4887	-14.7465	-14.8991	-15.0655	-15.0791	-15.0112	-14.8829	-14.9475	-14.9718	-15.083	-15.2239	-15.4855	-15.7606	-16.1641	-16.4271	-16.6079	-17.1743	-17.3471	-17.6539	-17.9852
ETE	0.430064	-9.71129	-11.0626	-11.8985	-12.4627	-12.9692	-13.503	-13.948	-14.381	-14.7252	-15.0877	-15.406	-15.5827	-15.7406	-15.967	-16.0568	-16.3289	-16.5568	-16.7829	-16.885	-17.4761	-17.5864	-17.789	-18.1254	-18.5027	-18.5897	-18.7363	-18.9727
FCA	0.417191	-9.31693	-10.7158	-11.6165	-12.2496	-12.7332	-13.1389	-13.5226	-13.7889	-14.0336	-14.2198	-14.319	-14.2853	-14.1948	-14.1124	-14.1746	-14.0041	-13.8726	-13.8531	-14.1067	-14.5636	-14.9544	-15.3318	-15.7373	-16.1588	-16.4598	-16.8388	-17.009
GGO	0.406494	-9.34232	-10.8306	-11.6388	-12.2236	-12.7683	-13.2293	-13.6251	-14.0762	-14.4879	-14.8674	-15.2703	-15.5444	-15.6972	-15.9439	-16.1927	-16.2638	-16.2356	-16.293	-16.6135	-16.8338	-17.1863	-17.3666	-17.8692	-18.0233	-18.327	-18.3937	-18.5421
HGL	0.400992	-9.52469	-11.1588	-11.9514	-12.5047	-12.9552	-13.3254	-13.659	-14.0098	-14.2101	-14.4519	-14.6175	-14.808	-14.9917	-15.0583	-15.2747	-15.4227	-15.5913	-15.8588	-16.1202	-16.6068	-16.9776	-17.3729	-17.7784	-18.4271	-18.3845	-18.9976	-18.9976
HSA	0.410976	-9.20203	-10.6315	-11.4861	-12.169	-12.7445	-13.2086	-13.6132	-13.8916	-14.1654	-14.3589	-14.6266	-14.739	-14.9294	-15.016	-15.1827	-15.1649	-15.1763	-15.0149	-15.0009	-15.2871	-15.5597	-15.8051	-16.0151	-16.3288	-16.5859	-16.9403	-17.2431
JJA	0.418737	-9.55496	-10.8426	-11.5445	-12.0912	-12.6394	-13.1484	-13.6314	-13.9938	-14.2817	-14.4739	-14.6255	-14.8778	-14.8719	-15.0023	-15.0667	-15.0695	-15.1385	-15.1339	-15.1996	-15.4792	-15.7726	-15.9858	-16.225	-16.5097	-16.8655	-16.9833	-17.185
LAF	0.40762	-9.66612	-11.0304	-11.7842	-12.3449	-12.8415	-13.2799	-13.7288	-14.2617	-14.7573	-15.0494	-15.2513	-15.4942	-15.6401	-15.6622	-15.8086	-15.8518	-16.1273	-16.1273	-16.3594	-16.5279	-16.7426	-17.0086	-17.2455	-17.328	-17.3608	-17.5566	-17.7831
LWE	0.41386	-9.40604	-10.837	-11.6625	-12.3029	-12.8654	-13.3994	-13.8641	-14.313	-14.7334	-15.0766	-15.4086	-15.5981	-15.9732	-16.2493	-16.4043	-16.6781	-17.0225	-17.0797	-17.6511	-17.7611	-18.3443	-18.5266	-19.2197	-19.3251	-20.4237	-19.9129	-20.8292
MAU	0.420154	-9.73466	-11.2668	-11.998	-12.4525	-12.881	-13.3264	-13.752	-14.1949	-14.5324	-14.8155	-15.0521	-15.1793	-15.2355	-15.356	-15.3856	-15.6192	-16.1658	-16.3852	-16.7091	-17.2056	-17.411	-17.9883	-18.3186	-18.6208	-19.1515	-18.815	-19.6623
MBR	0.426136	-9.31662	-10.8454	-11.6849	-12.2901	-12.8199	-13.3557	-13.958	-14.4959	-15.0251	-15.6005	-16.2439	-16.5034	-16.7935	-17.4013	-17.5168	-17.9429	-18.4642	-18.9237	-18.8437	-20.0224	-20.31	-19.7992	-20.7155	-19.7992	-20.7155	-20.7155	-20.7155
MDA	0.427017	-9.34635	-10.7796	-11.5501	-12.1588	-12.6905	-13.2381	-13.837	-14.2504	-14.6712	-15.0593	-15.7233	-16.3778	-16.8772	-17.5704	-17.5259	-17.8888	-18.1765	-18.7155	-19.2751	-20.2559	-19.7451	-20.2559	-20.6614	-20.2559	-21.3545	-20.6614	-21.3545
MDO	0.375944	-9.15739	-10.7165	-11.3288	-11.6492	-11.9524	-12.2717	-12.6149	-12.9348	-13.1758	-13.3733	-13.5482	-13.6722	-13.7937	-13.8966	-13.9297	-14.0038	-14.085	-14.1965	-14.3349	-14.4899	-14.5729	-14.687	-14.8579	-14.9189	-15.157	-15.2449	-15.4364
MEU	0.388717	-9.2631	-10.6986	-11.4111	-11.9756	-12.5063	-12.8981	-13.2988	-13.5627	-13.8368	-14.0294	-14.3262	-14.4816	-14.65	-14.8049	-14.9545	-14.952	-15.0596	-15.0901	-15.1648	-15.2178	-15.4176	-15.3606	-15.4454	-15.5381	-15.5055	-15.6019	-15.6904
MFA	0.409524	-9.33482	-10.8276	-11.6693	-12.3165	-12.856	-13.3443	-13.7493	-14.0905	-14.3722	-14.6879	-15.0463	-15.2471	-15.4336	-15.663	-15.8794	-16.1019	-16.1267	-16.2531	-16.4711	-16.7504	-17.2217	-17.66	-17.9477	-17.9702	-18.7586	-19.3565	-19.5571
MFU	0.414777	-9.37638	-10.8023	-11.6015	-12.1996	-12.6863	-13.0787	-13.4731	-13.7882	-13.9362	-14.1398	-14.226	-14.2714	-14.3123	-14.422	-14.6859	-15.2079	-15.6303	-16.1666	-17.0467	-17.7623	-18.3685	-19.0616	-18.7133	-19.7548	-19.7548	-20.4479	-19.6006
MIM	0.414675	-9.07474	-10.4574	-11.3296	-11.9494	-12.5253	-12.9292	-13.3459	-13.7216	-14.025	-14.2466	-14.4563	-14.6291	-14.7547	-14.7062	-14.6944	-14.7261	-14.7451	-14.6688	-14.8085	-14.916	-15.1424	-15.6271	-15.989	-16.1992	-16.5959	-17.0782	-17.5796
MLU	0.425036	-9.31633	-10.8213	-11.6509	-12.2774	-12.7915	-13.1737	-13.5568	-14.0186	-14.2472	-14.3802	-14.4768	-14.5357	-14.4102	-14.2202	-14.1411	-14.0343	-13.8918	-13.7189	-13.7803	-14.0503	-14.5697	-15.016	-15.277	-15.6437	-15.9834	-16.6459	-16.6459
MMS	0.41988	-9.50004	-11.0542	-11.7527	-12.2385	-12.6662	-13.054	-13.373	-13.6422	-13.8463	-14.0006	-14.101	-14.1471	-14.2073	-14.1767	-14.1916	-14.1183	-14.0622	-13.9301	-13.8973	-14.0947	-14.2518	-14.5248	-14.6547	-14.8885	-15.1417	-15.4972	-15.846
MMU	0.409289	-9.45167	-10.9576	-11.7781	-12.4337	-13.06	-13.6994	-14.3054	-15.0154	-15.6998	-16.2688	-17.2278	-17.5666	-18.1972	-18.6492	-19.4965	-19.2958	-19.7478	-19.4965	-21.6937	-20.3074	-19.902	-20.0843	-21.0006	-21.0006	-20.3074	-19.902	-20.5951
MOC	0.427852	-9.70724	-11.2586	-11.9773	-12.4514	-12.8992	-13.304	-13.7825	-14.2146	-14.6088	-14.7151	-14.935	-14.9812	-15.0027	-14.9148	-14.9903	-15.0457	-15.0571	-15.1466	-15.1234	-15.4318	-15.7503	-15.9419	-16.2855	-16.4837	-17.0014	-17.2332	-17.3242
NLE	0.40899	-9.25832	-10.7324	-11.5652	-12.1884	-12.7129	-13.1174	-13.515	-13.8629	-14.1334	-14.3964	-14.6889	-14.8396	-14.9932	-15.0652	-15.1306	-15.0922	-15.0365	-15.0909	-15.3124	-15.7559	-16.3902	-16.8028	-17.5326	-17.9306	-18.6018	-19.0292	-19.9455
OAF	0.400682	-9.53836	-10.9626	-11.713	-12.2227	-12.6397	-12.9915	-13.3573	-13.5991	-13.7838	-13.9016	-14.036	-14.1523	-14.3092	-14.4042	-14.5335	-14.6961	-14.8256	-15.036	-15.3396	-15.6381	-15.9677	-16.4669	-16.6534	-16.9958	-17.4408	-17.5209	-17.8085
OAN	0.434128	-10.2781	-11.6901	-12.3968	-12.8355	-13.2519	-13.6361	-13.9918	-14.3847	-14.7443	-15.0375	-15.2825	-15.4968	-15.5416	-15.7662	-15.8211	-15.9274	-16.0165	-16.0823	-16.2166	-16.2166	-16.4594	-16.7702	-17.2074	-17.1914	-17.8082	-17.9006	-18.562
OAR	0.418721	-9.36638	-10.891	-11.6405	-12.1853	-12.6167	-13.034	-13.3876	-13.7346	-13.9511	-14.2416	-14.5088	-14.5988	-14.7636	-14.831	-14.9562	-15.1917	-15.243	-15.4878	-15.6794	-16.0401	-16.4168	-16.7704	-17.2224	-17.6278	-18.1567	-18.5177	-18.4751
OCU	0.428096	-9.79457	-11.3754	-12.097	-12.4779	-12.8265	-13.1635	-13.5014	-13.7708	-14.0062	-14.3805	-14.6947	-14.9541	-15.0643	-15.1896	-15.3417	-15.4697	-15.8167	-16.0893	-16.5213	-17.116	-17.7485	-18.7359	-19.2824	-20.5817	-21.6803	-21.6803	-20.5817
ODE	0.41384	-9.7979	-11.5044	-12.2973	-12.816	-13.2496	-13.5807	-13.7457	-14.0673	-14.0817	-14.0663	-14.0905	-14.1174	-14.0622	-14.0622	-14.075	-14.2117	-14.297	-14.5633	-14.9432	-15.3886	-15.8211	-16.3771	-16.8709	-17.1727	-17.1957	-17.738	-18.0391
OGA	0.411144	-9.65651	-11.1853	-12.0225	-12.5852	-12.9824	-13.3115	-13.6606	-14.0818	-14.4801	-15.045	-15.6575	-16.2442	-16.7696	-17.4709	-17.9441	-18.6373	-18.9427	-19.6358	-20.1954	-20.8886	-20.8886	-21.5817	-21.5817	-21.5817	-21.5817	-21.5817	-21.5817
OOR	0.413483	-9.20071	-10.7577	-11.528	-11.9914	-12.4754	-12.831	-13.1325	-13.2829	-13.4862	-13.7421	-13.9605	-14.2616	-14.5237	-14.9247	-15.3035	-15.6676	-16.1268	-16.416	-16.73	-17.2713	-17.545	-18.1667	-18.2759	-18.7614	-18.356	-18.7614	-19.0491
OPR	0.433478	-9.84993	-11.2522	-11.9845	-12.5293	-13.032	-13.4946	-14.0293	-14.4259	-14.7992	-15.0584	-15.3503	-15.681	-15.9588	-16.1254	-16.3709	-16.6877	-16.9693	-17.3277	-17.8046	-18.3436	-18.6155	-19.1909	-19.4422	-19.5964	-20.0018	-20.2895	-20.2895
ORO	0.413631	-9.42229	-10.8466	-11.6802	-12.2851	-12.8173	-13.2291	-13.5925	-13.9797	-14.0675	-14.6026	-14.9854	-15.3121	-15.7362	-16.0925	-16.4937	-16.9119	-17.3222	-17.9454	-18.0598	-18.5118	-19.2537	-19.6104	-19.6104	-19.9469	-20.17	-21.5563	-20.8632
PAB	0.407201	-9.2204	-10.6621	-11.4902	-12.1454	-12.7458	-13.2349	-13.6644	-13.9946	-14.3479	-14.6223	-14.8308	-15.0123	-15.162	-15.4727	-15.5576	-15.6832	-15.757	-15.9612	-16.0939	-16.3764	-16.7714	-17.1989	-17.7419	-18.1392	-19.0802	-19.0802	-20.4665
PAL	0.397519	-9.29593	-10.7837	-11.6969	-12.3825	-13.0451	-13.6846	-14.3741	-15.0503	-15.6918	-16.32	-16.7161	-17.3816	-17.6512	-17.9877	-18.824	-18.904	-19.0863	-18.991	-20.0026	-19.5972	-19.5972	-20.6958	-21.3889	-20.6958	-21.3889	-20.6958	-21.3889
PAN	0.409638	-9.37912	-10.8979	-11.7293	-12.3692	-12.9341	-13.4308	-13.8817	-14.253	-14.5988	-14.8581	-15.2446	-15.5357	-15.7219	-15.8376	-16.0111	-16.2602	-16.0588	-16.0018	-16.1509	-16.3651	-16.6981	-16.8584	-17.2748	-17.2531	-17.7783	-18.2892	-18.4535
PCA	0.410771	-9.83327	-11.3559	-12.2807	-12.9917	-13.6322	-14.0606	-14.5838	-14.8665	-15.2187	-15.5644	-15.8689	-16.1598	-16.4093	-16.5588	-16.8749	-17.1024	-17.3537	-17.7521	-17.841	-18.1683	-18.4667	-18.3441	-19.0373	-18.8297	-19.2997	-19.1173	-19.6563
PHO	0.420139	-9.41339	-10.8826	-11.6215	-12.1805	-12.6475	-13.0231	-13.4211	-13.692	-13.9715	-14.3309	-14.5687	-14.7291	-15.1326	-15.7792	-16.1055	-16.7229	-17.0277	-17.5157	-17.8362	-18.347	-18.6471	-19.4456	-19.2449	-19.4456	-19.3403	-19.3403	-19.5634
PPA	0.407442	-9.17282	-10.67	-11.5167	-12.1713	-12.7353	-13.1581	-13.6008	-13.961	-14.314	-14.6734	-14.9553	-15.2461	-15.4878	-15.6014	-15.7372	-15.7651	-15.6531	-15.6835	-15.818	-15.9831	-16.2007	-16.4228	-16.8283	-16.8663	-17.2263	-17.5517	-17.7943
PTR	0.408486	-9.15974	-10.6282	-11.4871	-12.1786	-12.7293	-13.1587	-13.5392	-13.8561	-14.1642	-14.4205	-14.6643	-14.8467	-15.0272	-15.0967	-15.1985	-15.1944	-15.1862	-15.1372	-15.2609	-15.5944	-16.2281	-16.5577	-16.819	-17.2245	-17.7284	-18.6533	-19.3909
PVA	0.399461	-9.03894	-10.5263	-11.5551	-12.205	-12.7252	-13.2248	-13.7334	-14.0915	-14.3965	-14.6735	-14.7961	-14.9243	-15.0752	-15.0394	-15.1611	-15.1162	-15.1122	-15.0487	-14.9595	-15.0339	-15.1364	-15.178	-15.276	-15.307	-15.4357	-15.6945	-15.7161
RNO	0.419337	-9.63056	-11.0973	-11.8475	-12.2988	-12.7288	-13.1368	-13.4975	-13.7981	-14.0091	-14.1502	-14.2573	-14.3359	-14.3564	-14.3591	-14.288	-14.2447	-14.1755	-14.0932	-14.085	-14.1584	-14.2837	-14.3931	-14.5535	-14.6929	-14.9079	-15.2797	-15.5371
SAR	0.416966	-9.28108	-10.6563	-11.4307	-11.9593	-12.4484	-12.8963	-13.3014	-13.685	-14.0033	-14.2569	-14.6187	-15.039	-15.4848	-15.8663	-16.3265	-16.8735	-17.2456	-17.6164	-18.1409	-18.675	-19.1103	-18.9433	-19.8988	-20.122	-20.122	-20.122	-20.4096
SBO	0.407692	-9.41329	-10.9645	-11.7907	-12.3889	-12.8404	-13.2722	-13.6364	-13.8954	-14.028	-14.1797	-14.2831	-14.427	-14.4587	-14.6156	-14.7479	-14.9957	-15.337	-15.6045	-16.1332	-16.6197	-17.153	-17.7592	-18.104	-18.3345	-18.74	-18.9223	-19.2325
SHA	0.360454	-8.98495	-10.5267	-11.2411	-11.597	-11.8495	-12.0903	-12.3279	-12.5525	-12.7078	-12.8141	-12.8878	-12.9407	-12.9518	-12.9733	-13.0754	-13.2359	-13.4444	-13.6507	-14.0909	-14.4923	-14.9876	-15.6085	-15.9937	-16.5413	-16.8152	-17.1837	-17.4421
SSC	0.417252	-9.39333	-10.7602	-11.5079	-12.0733	-12.5611	-13.0222	-13.4142	-13.7435	-14.0378	-14.2563	-14.4527	-14.5987	-14.7157	-14.7719	-14.9751	-15.1206	-15.1625	-15.2014	-15.3246	-15.7807	-16.075	-16.3438	-16.6984	-17.2777	-17.5528	-17.8859	-18.2131
STR	0.399091	-9.41415	-10.9296	-11.6466	-12.1031	-12.4845	-12.8399	-13.2282	-13.497	-13.7732	-13.8864	-14.0429	-14.1338	-14.2411	-14.4253	-14.4962	-14.6827	-14.8468	-15.1758	-15.4584	-15.7833	-16.1903	-16.4019	-16.9459	-16.9966	-17.3866	-17.8974	-18.0346
TBE	0.413471	-9.59053	-10.9787	-11.573	-11.9832	-12.3753	-12.7757	-13.1762	-13.6067	-13.9319	-14.4154	-14.7523	-15.0912	-15.3824	-15.6234	-15.954	-16.3914	-16.6566	-17.1654	-17.5449	-17.6417	-18.1639	-18.886	-19.3213	-19.4167	-19.9275	-20.1098	-20.1098
TMA	0.407331	-9.54192	-10.9053	-11.7313	-12.3744	-12.9544	-13.4011	-13.8576	-14.1917	-14.5076	-14.8182	-15.0485	-15.2961	-15.5869	-15.9306	-16.2284	-16.5713	-16.8514	-17.1568	-17.5987	-17.9576	-18.3406	-18.5229	-19.3439	-19.3439	-20.1324	-19.5446	-20.1324
TSY	0.398697	-9.51613	-11.089	-11.9336	-12.5916	-13.2011	-13.732	-14.0418	-14.3935	-14.6453	-14.8762	-15.1341	-15.2574	-15.3569	-15.5195	-15.5979	-15.7481	-15.8532	-15.9613	-16.1289	-16.2008	-16.6361	-16.8593	-16.9885	-17.6149	-17.4654	-17.9579	-18.484
TTR	0.415717	-9.26279	-10.7766	-11.5543	-12.1376	-12.6606	-13.0821	-13.3678	-13.6162	-13.7672	-13.8795	-13.9824	-14.0587	-14.1254	-14.2191	-14.3041	-14.4102	-14.4117	-14.4885	-14.6023	-14.8658	-15.1502	-15.1884	-15.4048	-15.6594	-15.8565	-16.2375	-16.4583
VPA	0.396832	-9.37629	-10.7193	-11.5274	-12.1278	-12.6219	-13.1021	-13.5134	-13.9262	-14.2472	-14.5861	-14.8257	-14.9735	-15.0886	-15.2445	-15.3304	-15.357	-15.3593	-15.4389	-15.507	-15.7614	-16.1568	-16.2903	-16.5799	-16.7916	-17.0243	-17.2356	-17.8716
Species		AC4	AC5	AC6	AC7	AC8	AC9	AC10	AC11	AC12	AC13	AC14	AC15	AC16	AC17	AC18	AC19	AC20	AC21	AC22	AC23	AC24	AC25	AC26	AC27	AC28	AC29	AC30
AME		-10.0952	-11.262	-11.9404	-12.4621	-12.8435	-12.7885	-12.7426	-13.5008	-13.7713	-13.9302	-12.4945	-13.1234	-16.2288	-16.0726	-16.3963	-16.6418	-16.937	-17.3733	-18.0982	-18.8241	-20.4335	-21.5321	-20.839	-21.5321	-21.5321	-20.839	-21.5321
BGR		-10.076	-11.0989	-11.7305	-12.2533	-12.7174	-13.0146	-13.168	-13.3577	-13.5147	-13.7596	-13.9724	-14.2571	-14.4309	-14.6136	-14.9931	-15.1591	-15.739	-16.0551	-16.6458	-16.9958	-17.7378	-18.1234	-18.3917	-18.7594	-18.8772	-18.8166	-19.0848
BTA		-10.1555	-11.1867	-11.8235	-12.38	-12.8552	-13.1776	-13.3822	-13.5398	-13.7161	-13.8258	-13.9776	-14.0602	-14.2262	-14.365	-14.5291	-14.6587	-14.9712	-15.1698	-15.4969	-15.833	-16.2823	-16.7373	-17.1494	-17.9479	-18.041	-19.0465	-19.6751
CAS		-10.3477	-11.5604	-12.2548	-12.8714	-13.3953	-13.8117	-14.0586	-14.2084	-14.3691	-14.452	-14.5549	-14.7095	-14.8143	-14.9685	-15.1771	-15.3697	-15.5996	-15.8703	-16.2128	-16.6085	-17.209	-17.9474	-18.3529	-19.2283	-19.5385	-19.9905	-19.7392
CCR		-10.0973	-11.182	-11.8511	-12.3848	-12.8432	-13.249	-13.4357	-13.4806	-13.5859	-13.6328	-13.7947	-13.9972	-14.3777	-14.6195	-14.8107	-15.027	-15.2275	-15.4847	-15.6415	-15.9255	-16.1137	-16.3164	-16.9809	-17.2006	-17.7172	-18.0247	-18.6787
CFA		-10.11	-11.2574	-11.9233	-12.4616	-12.9084	-13.2111	-13.3342	-13.436	-13.456	-13.449	-13.4182	-13.5167	-13.617	-13.7534	-13.8792	-14.0858	-14.2872	-14.7041	-15.2344	-15.8689	-16.7053	-17.6445	-18.5512	-19.9863	-19.9863	-21.5957	-21.5957
CFE		-10.0003	-11.1717	-11.863	-12.3549	-12.7769	-13.1079	-13.2628	-13.4454	-13.5537	-13.7249	-13.8301	-14.0153	-14.1375	-14.2269	-14.4245	-14.5135	-14.6758	-14.8468	-14.9763	-15.1886	-15.3858	-15.6856	-16.0201	-16.412	-16.7364	-16.8243	-17.2983
CGR		-9.57074	-10.6522	-11.3141	-11.8457	-12.2516	-12.5526	-12.7639	-12.8505	-12.9242	-12.8975	-12.8807	-12.789	-12.7412	-12.6249	-12.449	-12.069	-11.815	-12.357	-12.6207	-12.7114	-12.8029	-13.0275	-13.2809	-13.573	-13.8963	-14.1984	-14.5913
CHI		-10.0375	-11.0239	-11.6902	-12.2808	-12.8435	-13.2743	-13.5516	-13.7214	-13.8246	-13.9316	-13.9433	-13.9766	-14.0116	-14.0594	-14.3301	-14.5842	-14.7843	-15.0428	-15.4381	-15.6497	-16.0818	-16.5206	-16.9658	-17.3759	-17.832	-18.2713	-18.9306
CHO		-10.1972	-11.5502	-12.2448	-12.8455	-13.3529	-13.6904	-13.9804	-14.1529	-14.2226	-14.3474	-14.4372	-14.521	-14.6201	-14.7132	-14.7886	-14.9666	-15.0464	-15.0767	-15.2201	-15.544	-15.669	-16.0261	-16.3715	-16.6931	-17.0772	-17.2271	-17.7831
CJA		-10.1138	-11.2403	-11.9584	-12.5635	-13.0014	-13.2609	-13.387	-13.5023	-13.4815	-13.5103	-13.5693	-13.6417	-13.7459	-13.8795	-13.9559	-14.0966	-14.2998	-14.5096	-14.8595	-15.2822	-15.9428	-16.6795	-17.5017	-18.4036	-19.5386	-20.6372	-20.3495
CLA		-10.1207	-11.4849	-12.2235	-12.8143	-13.2409	-13.5936	-13.7165	-13.7753	-13.7779	-13.7422	-13.7142	-13.6584	-13.6377	-13.6224	-13.6513	-13.7333	-13.8289	-14.0291	-14.3246	-14.8018	-15.3387	-15.9289	-16.7131	-17.6781	-18.2912	-18.5536	-19.6034
CPO		-10.2432	-11.6556	-12.4599	-13.0466	-13.5117	-13.8361	-13.9696	-14.1304	-14.102	-14.0599	-13.9962	-13.9246	-13.84	-13.7345	-13.6401	-13.5957	-13.5576	-13.5492	-13.6908	-14.1412	-14.8174	-15.7548	-16.7056	-17.811	-18.6118	-20.0934	-19.9111
CSI		-10.0308	-11.0471	-11.7234	-12.4033	-13.0045	-13.4263	-13.6626	-13.8416	-13.9529	-14.0103	-14.133	-14.2241	-14.2796	-14.4326	-14.5382	-14.7835	-15.1265	-15.4215	-16.0594	-16.5097	-16.9697	-17.6728	-18.4068	-18.5403	-19.1869	-19.2822	-19.6389
DNO		-10.3241	-11.6017	-12.3777	-13.0488	-13.658	-14.1411	-14.5332	-14.8008	-15.0205	-15.2998	-15.4956	-15.7794	-16.001	-16.2034	-16.4835	-16.7697	-16.9684	-17.3633	-17.8567	-18.2036	-18.3063	-18.7391	-19.4323	-20.3077	-20.8186	-20.1254	-20.5309
DOR		-10.0349	-11.0278	-11.5919	-11.9721	-12.2508	-12.4597	-12.5618	-12.6748	-12.7175	-12.7269	-12.7736	-12.7579	-12.8176	-12.9087	-12.9806	-13.0652	-13.1663	-13.2856	-13.4589	-13.632	-13.9214	-14.1712	-14.4535	-14.6414	-14.9938	-15.3053	-15.5338
ECA		-10.1254	-11.2782	-12.017	-12.6386	-13.1661	-13.5	-13.7447	-13.9352	-14.1263	-14.3015	-14.5374	-14.7313	-14.9399	-15.1446	-15.4307	-15.6811	-16.0813	-16.4012	-16.8316	-17.3622	-17.7821	-18.2434	-19.5313	-20.2244	-20.5121	-20.2244	-20.9176
EED		-10.2993	-11.557	-12.332	-12.8008	-13.1755	-13.4528	-13.6385	-13.7108	-13.7223	-13.7242	-13.71	-13.724	-13.7558	-13.7675	-13.7967	-13.8505	-13.9642	-14.042	-14.3236	-14.7171	-15.2176	-15.9356	-16.5942	-17.2035	-17.8112	-18.0719	-18.5208
EEU		-10.0099	-10.9117	-11.5849	-12.1164	-12.5625	-12.8924	-13.1131	-13.2336	-13.3254	-13.3267	-13.3243	-13.3328	-13.3264	-13.2888	-13.3402	-13.3116	-13.3512	-13.3741	-13.4508	-13.5233	-13.6632	-13.7707	-14.0063	-14.1921	-14.4713	-14.7538	-15.0647
EFU		-10.0134	-11.2012	-11.8989	-12.4831	-12.9616	-13.2751	-13.4755	-13.5668	-13.5868	-13.5655	-13.6081	-13.5059	-13.4499	-13.3484	-13.2329	-13.1673	-13.1501	-13.2412	-13.4227	-13.7956	-14.3089	-15.0811	-15.8452	-16.5216	-17.5108	-17.7339	-18.4271
ETE		-10.0397	-11.3146	-12.0726	-12.6789	-13.084	-13.2964	-13.4252	-13.459	-13.4679	-13.4846	-13.4696	-13.5495	-13.6641	-13.7409	-13.7292	-13.7684	-13.8393	-13.8996	-14.0724	-14.433	-14.8762	-15.5259	-16.101	-16.6701	-17.35	-17.749	-18.0973
FCA		-10.1143	-11.2646	-12.0313	-12.5967	-13.0596	-13.3217	-13.4655	-13.4812	-13.4703	-13.4382	-13.3785	-13.3455	-13.3084	-13.2648	-13.1985	-13.1985	-13.2284	-13.3365	-13.541	-13.9336	-14.5054	-15.1508	-15.9139	-16.5865	-16.9988	-17.9462	-18.0002
GGO		-10.1016	-11.2551	-11.9789	-12.5328	-12.954	-13.2058	-13.265	-13.3806	-13.4856	-13.749	-14.0795	-14.2484	-14.3908	-14.5283	-14.6462	-14.7525	-14.8817	-15.0677	-15.1972	-15.3378	-15.4438	-15.7089	-16.0053	-16.3405	-16.5792	-16.8858	-17.379
HGL		-10.2382	-11.524	-12.2427	-12.8133	-13.2324	-13.5068	-13.5802	-13.6145	-13.6089	-13.6213	-13.6117	-13.6306	-13.6542	-13.7047	-13.769	-13.9143	-14.173	-14.4784	-14.8533	-15.2766	-15.8005	-16.5586	-16.9279	-17.7339	-18.0968	-18.2304	-18.9235
HSA		-10.0805	-11.194	-11.9346	-12.5414	-13.0355	-13.4164	-13.5962	-13.7084	-13.7758	-13.8285	-13.8902	-13.948	-13.9745	-14.0006	-14.0871	-14.2048	-14.258	-14.4081	-14.6142	-14.8342	-15.1905	-15.6156	-16.2361	-16.6232	-17.0846	-17.7606	-18.1246
JJA		-9.79224	-10.907	-11.5275	-12.0785	-12.5405	-12.8402	-12.9795	-13.0081	-13.0385	-12.9922	-13.0099	-13.074	-13.1089	-13.1628	-13.2248	-13.2427	-13.3389	-13.4601	-13.7076	-14.0881	-14.706	-15.5052	-16.2998	-17.2088	-17.438	-18.2265	-18.5366
LAF		-10.1318	-11.3128	-12.0029	-12.6337	-13.1771	-13.5456	-13.8351	-14.0613	-14.2784	-14.4395	-14.6294	-14.8485	-15.1272	-15.4118	-15.5953	-15.9337	-16.2961	-16.6512	-16.9262	-17.4786	-17.8176	-18.4933	-18.9703	-19.2957	-20.0689	-20.4743	-20.762
LWE		-10.1408	-11.272	-11.9312	-12.3943	-12.8073	-13.0833	-13.2285	-13.3019	-13.3756	-13.511	-13.6445	-13.858	-14.0207	-14.281	-14.4431	-14.6246	-14.9557	-15.3717	-15.7447	-16.4103	-17.3479	-18.0566	-18.9574	-18.8833	-19.5764	-19.7306	-20.136
MAU		-9.51733	-10.5945	-11.2453	-11.7517	-12.1053	-12.3607	-12.5413	-12.6545	-12.69	-12.7482	-12.7688	-12.7507	-12.79	-12.7983	-12.8347	-12.9011	-13.1093	-13.11	-13.0916	-13.1718	-13.3097	-13.516	-13.8163	-14.1617	-14.4118	-14.8194	-15.1699
MBR		-10.0002	-11.2349	-11.9699	-12.5152	-12.9727	-13.2997	-13.4191	-13.4585	-13.4886	-13.266	-13.2547	-13.415	-13.5727	-13.5275	-13.4536	-13.4321	-13.4504	-13.5794	-13.7585	-14.1488	-14.7018	-15.2928	-16.0954	-16.8869	-17.5168	-18.2306	-17.9747
MDA		-9.9731	-11.16	-11.8688	-12.3787	-12.7956	-13.0429	-13.2023	-13.1975	-13.142	-13.2899	-13.3228	-13.3602	-13.4599	-13.5361	-13.5979	-13.62	-13.7135	-13.9144	-14.2212	-14.7095	-15.2255	-15.8411	-16.4717	-17.2114	-17.5044	-18.0223	-18.31
MDO		-10.6954	-11.8019	-12.4973	-12.9984	-13.4232	-13.729	-13.941	-14.0809	-14.2083	-14.2236	-14.2657	-14.2752	-14.2843	-14.3163	-14.3499	-14.3272	-14.2981	-14.3426	-14.3681	-14.3636	-14.4562	-14.5741	-14.8004	-15.0396	-15.3666	-15.6516	-16.1095
MEU		-10.1067	-11.087	-11.7556	-12.3104	-12.7888	-13.0827	-13.2784	-13.3822	-13.4328	-13.4181	-13.4698	-13.4428	-13.4436	-13.4684	-13.4807	-13.5487	-13.6496	-13.7777	-13.8922	-14.0662	-14.2364	-14.4322	-14.6637	-14.8405	-14.9731	-15.1941	-15.4235
MFA		-10.0522	-11.0791	-11.7343	-12.2813	-12.7707	-13.1406	-13.3857	-13.5543	-13.6951	-13.785	-13.916	-14.0003	-14.0504	-14.2037	-14.2694	-14.326	-14.4181	-14.518	-14.7034	-14.9486	-15.3442	-15.7882	-16.2289	-16.8565	-17.1004	-17.5647	-17.9702
MFU		-10.1123	-11.2942	-11.9843	-12.4388	-12.796	-13.0287	-13.1867	-13.2188	-13.2527	-13.253	-13.2487	-13.3451	-13.5372	-13.7386	-14.0225	-14.4116	-15.0604	-15.8197	-16.846	-17.7179	-18.9816	-19.7548	-21.5465	-20.1602	-20.4479	-19.9371	-20.8534
MIM		-10.1353	-11.3831	-12.1475	-12.7117	-13.1261	-13.51	-13.7359	-13.8514	-13.9384	-14.031	-14.0492	-14.1117	-14.1808	-14.2933	-14.4311	-14.4907	-14.5598	-14.6291	-14.7533	-14.8365	-15.0661	-15.4687	-15.7996	-16.2846	-16.7661	-17.0504	-17.652
MLU		-10.052	-11.3275	-12.0587	-12.6588	-13.0913	-13.3717	-13.5335	-13.6213	-13.5332	-13.4618	-13.3691	-13.3619	-13.3317	-13.3305	-13.3005	-13.2909	-13.4458	-13.6255	-13.9134	-14.4288	-15.0751	-15.8661	-16.5873	-17.6383	-18.3084	-18.9146	-20.0132
MMS		-9.54473	-10.4996	-11.0628	-11.5834	-12.0345	-12.3753	-12.5835	-12.6748	-12.7303	-12.7157	-12.6932	-12.6755	-12.6594	-12.6323	-12.5956	-12.5934	-12.6283	-12.6236	-12.6746	-12.7957	-13.0156	-13.3101	-13.65	-14.0482	-14.4499	-14.8885	-15.3284
MMU		-10.0037	-11.0577	-11.7492	-12.2747	-12.692	-13.0501	-13.277	-13.488	-13.6015	-13.7946	-13.8834	-13.9826	-14.1552	-14.2021	-14.351	-14.5352	-14.6798	-14.8847	-15.2608	-15.8021	-16.2427	-16.9575	-17.4452	-18.0561	-18.8605	-18.7493	-19.0547
MOC		-9.44283	-10.4879	-11.214	-11.8064	-12.2446	-12.554	-12.7666	-12.8607	-12.9588	-13.0139	-13.0073	-13.024	-13.0092	-12.9872	-12.9547	-12.9221	-12.8917	-12.893	-12.9299	-13.0791	-13.3045	-13.6655	-14.1317	-14.6429	-15.1869	-15.6296	-16.2203
NLE		-10.1567	-11.2855	-11.9802	-12.5452	-13.0118	-13.305	-13.4045	-13.4624	-13.5868	-13.6988	-13.9041	-13.9824	-14.1929	-14.3197	-14.4525	-14.5481	-14.6144	-14.7091	-14.8	-14.9574	-15.3708	-15.7383	-16.5223	-17.0738	-17.5178	-18.37	-19.4347
OAF		-10.2498	-11.4324	-12.1054	-12.5945	-12.9575	-13.2015	-13.0883	-13.2096	-13.326	-13.5793	-14.0204	-14.4946	-14.9753	-15.4504	-15.9627	-16.5764	-17.01	-17.8408	-18.5844	-19.3867	-19.8722	-20.1599	-21.2585	-21.9517	-21.9517	-21.9517	-21.9517
OAN		-10.5807	-11.7215	-12.3777	-12.9008	-13.3535	-13.6284	-13.8968	-14.0629	-14.2537	-14.3992	-14.5535	-14.7609	-14.9528	-15.2143	-15.4881	-15.5446	-15.8707	-16.1871	-16.3648	-16.8919	-16.9401	-17.4844	-18.0387	-18.1157	-18.5014	-18.7696	-19.3887
OAR		-10.0642	-11.0527	-11.7073	-12.3001	-12.8732	-13.2618	-13.5543	-13.6657	-13.7903	-13.9213	-13.9772	-14.102	-14.191	-14.2508	-14.3386	-14.4431	-14.6127	-14.8767	-15.1747	-15.3653	-15.7026	-16.0773	-16.4771	-16.9898	-17.2344	-17.5589	-17.869
OCU		-10.0814	-11.2495	-11.9133	-12.4123	-12.7558	-12.9421	-12.9835	-12.9873	-12.9514	-13.0903	-13.3056	-13.7555	-14.201	-14.7686	-15.347	-15.9278	-16.6434	-17.3236	-17.9427	-19.1154	-19.8886	-20.294	-21.6803	-20.5817	-21.6803	-21.6803	-20.9872
ODE		-10.1927	-11.5098	-12.099	-12.659	-13.0663	-13.3079	-13.4286	-13.3706	-13.1639	-12.9631	-12.9755	-12.9831	-13.0045	-12.9606	-12.921	-12.9898	-13.1455	-13.3709	-13.7391	-14.2593	-14.9742	-15.92	-16.7749	-17.4604	-18.6543	-18.7056	-19.4528
OGA		-10.084	-11.3084	-12.0903	-12.7582	-13.2945	-13.7089	-13.9459	-14.0626	-14.166	-14.2705	-14.3776	-14.6167	-14.84	-15.1504	-15.5631	-16.1095	-16.8543	-17.4546	-18.3629	-18.9427	-19.9723	-20.8886	-21.5817	-21.5817	-20.8886	-21.5817	-21.5817
OOR		-10.1381	-11.2534	-11.9476	-12.567	-12.9955	-13.3684	-13.5585	-13.6176	-13.5713	-13.5938	-13.4949	-13.3876	-13.6933	-13.8337	-13.6847	-13.8252	-14.0181	-13.9543	-14.1867	-14.2991	-14.9274	-14.8296	-15.5526	-16.1047	-14.8955	-15.5602	-16.287
OPR		-9.97438	-11.1943	-11.8815	-12.4021	-12.8108	-13.1367	-13.2705	-13.3194	-13.3519	-13.3764	-13.4369	-13.5005	-13.6721	-13.8364	-13.99	-14.3529	-14.6595	-15.0855	-15.4401	-16.1678	-16.8663	-17.4369	-18.9902	-19.0855	-21.3881	-20.695	-20.695
ORO		-10.1302	-11.2535	-11.9287	-12.3661	-12.8606	-13.0655	-13.1568	-13.1697	-12.9824	-13.2339	-13.5072	-13.3109	-13.991	-14.408	-14.5027	-14.6842	-14.8349	-15.1138	-15.3951	-15.8626	-16.5457	-17.0024	-17.6851	-18.4208	-18.9173	-19.0714	-19.3591
PAB		-10.1146	-11.2193	-11.9293	-12.4658	-12.9139	-13.2266	-13.4121	-13.5543	-13.6708	-13.7584	-13.8974	-14.0184	-14.1548	-14.2336	-14.4364	-14.6487	-14.9068	-15.1695	-15.5875	-15.8416	-16.3037	-16.6995	-17.1894	-17.4834	-17.4834	-17.921	-17.961
PAL		-10.069	-11.219	-11.9705	-12.5187	-12.9389	-13.1848	-13.3766	-13.4182	-13.5142	-13.4168	-13.5834	-13.7905	-13.9895	-14.008	-14.0358	-14.0979	-14.2028	-14.2848	-14.3259	-14.5014	-14.7245	-15.0345	-15.3463	-15.9862	-16.4261	-17.0582	-17.1122
PAN		-10.0829	-11.1332	-11.8079	-12.3447	-12.8362	-13.1127	-13.296	-13.4289	-13.5221	-13.6925	-13.7934	-13.9485	-14.1265	-14.2736	-14.4494	-14.6295	-14.814	-14.9462	-15.0998	-15.5338	-15.883	-16.4627	-16.9494	-17.8344	-18.5668	-18.9525	-19.1466
PCA		-10.1006	-11.4718	-12.2731	-12.8834	-13.4728	-13.785	-14.0272	-14.1592	-14.3354	-14.4484	-14.5573	-14.7137	-14.8641	-15.0598	-15.2392	-15.416	-15.649	-15.8092	-15.9498	-16.1996	-16.3928	-16.3873	-16.5916	-16.9579	-16.8065	-17.2982	-17.3537
PHO		-10.0641	-11.0486	-11.6977	-12.2723	-12.8142	-13.2377	-13.546	-13.6587	-13.75	-13.8321	-13.9035	-13.8726	-14.0601	-14.2422	-14.4137	-14.5679	-14.8882	-15.2115	-15.5721	-16.0297	-16.4554	-16.7908	-17.2608	-17.751	-18.0593	-18.3106	-18.5983
PPA		-10.0934	-11.1948	-11.9013	-12.4687	-12.9041	-13.2121	-13.3577	-13.4924	-13.597	-13.7078	-13.8993	-14.0132	-14.194	-14.4149	-14.4819	-14.6674	-14.7194	-14.9519	-15.0771	-15.2569	-15.4608	-15.7372	-16.1389	-16.5166	-17.121	-17.3441	-17.8141
PTR		-10.1137	-11.1965	-11.9212	-12.4581	-12.9231	-13.2086	-13.3613	-13.4846	-13.5957	-13.7157	-13.8429	-13.964	-14.1068	-14.2589	-14.3641	-14.5026	-14.6938	-14.8275	-15.0578	-15.3196	-15.634	-16.1757	-16.7199	-17.4848	-17.7284	-18.5307	-18.7931
PVA		-10.1005	-11.2992	-12.0942	-12.6352	-13.0838	-13.4494	-13.593	-13.7552	-13.7603	-13.8615	-13.9225	-13.9255	-13.9992	-14.029	-13.9476	-14.0695	-14.0674	-14.0521	-14.0674	-14.103	-14.2853	-14.4504	-14.6916	-15.0247	-15.3667	-15.7877	-16.2639
RNO		-9.37887	-10.3253	-11.0767	-11.684	-12.1415	-12.481	-12.6935	-12.7809	-12.8116	-12.792	-12.7326	-12.6776	-12.6421	-12.5873	-12.508	-12.4393	-12.4085	-12.344	-12.3293	-12.3615	-12.5179	-12.7605	-13.1034	-13.4674	-13.9078	-14.4064	-14.9114
SAR		-9.78353	-10.945	-11.7575	-12.3773	-12.8262	-13.1166	-13.2681	-13.2916	-13.3052	-13.3113	-13.3627	-13.3924	-13.4342	-13.432	-13.485	-13.5441	-13.6782	-13.7538	-13.9154	-14.0805	-14.2791	-14.5217	-14.849	-15.0546	-15.4656	-15.8523	-16.1755
SBO		-10.0641	-11.1907	-11.9701	-12.5773	-13.0701	-13.3421	-13.5211	-13.5774	-13.544	-13.5529	-13.5012	-13.5348	-13.5554	-13.4974	-13.4194	-13.4062	-13.4509	-13.6469	-13.9656	-14.4812	-15.2334	-16.2505	-17.1417	-17.8017	-18.6346	-18.6859	-18.5858
SHA		-10.3797	-11.3711	-11.9959	-12.4891	-12.8803	-13.1398	-13.2905	-13.3395	-13.3702	-13.286	-13.248	-13.1945	-13.2478	-13.2947	-13.4052	-13.5399	-13.7285	-14.0603	-14.5532	-15.0076	-15.6147	-16.1221	-16.7299	-17.245	-17.5647	-18.0853	-18.0376
SSC		-10.1884	-11.2948	-11.8909	-12.4238	-12.8432	-13.2151	-13.4411	-13.5936	-13.7005	-13.7831	-13.8568	-13.8987	-14.0313	-14.0624	-14.1763	-14.2569	-14.348	-14.4015	-14.5646	-14.7137	-15.0989	-15.3427	-15.6045	-15.9738	-16.3048	-16.6499	-16.9932
STR		-10.122	-11.2953	-11.9703	-12.4638	-12.829	-13.0938	-13.3023	-13.3571	-13.3219	-13.3374	-13.2808	-13.2805	-13.2732	-13.2306	-13.2251	-13.2826	-13.339	-13.497	-13.7195	-14.0727	-14.5606	-15.198	-15.9479	-16.557	-17.2843	-17.6097	-17.9501
TBE		-9.40139	-10.5709	-11.2318	-11.8647	-12.3426	-12.6816	-12.8962	-12.9558	-13.006	-12.9813	-12.9334	-12.9428	-12.9829	-13.002	-13.1216	-13.3429	-13.6908	-14.2126	-14.7665	-15.5127	-16.3486	-17.1241	-17.958	-18.1929	-19.1543	-19.4167	-19.2343
TMA		-10.088	-11.2173	-11.922	-12.6095	-13.2054	-13.6009	-13.852	-14.0231	-14.1494	-14.2081	-14.317	-14.3547	-14.3919	-14.4976	-14.6601	-14.7636	-15.0013	-15.2138	-15.5393	-15.7354	-16.0052	-16.4237	-16.6984	-17.1671	-17.5371	-17.5371	-18.2453
TSY		-10.3096	-11.5306	-12.2503	-12.9071	-13.4143	-13.7755	-14.031	-14.0436	-14.0995	-14.1462	-14.1312	-14.1068	-14.1005	-14.0871	-14.1063	-14.1145	-14.0971	-14.0707	-14.0716	-14.0777	-14.1794	-14.3543	-14.6265	-14.9441	-15.4231	-15.8643	-16.4437
TTR		-10.1458	-11.261	-11.9589	-12.5639	-13.1084	-13.4473	-13.6233	-13.7526	-13.7575	-13.8348	-13.8235	-13.8659	-13.8632	-13.8614	-13.8855	-13.8636	-13.9388	-14.0065	-14.1581	-14.3683	-14.6535	-15.075	-15.5863	-15.9943	-16.1903	-16.4888	-16.6799
VPA		-9.94733	-11.169	-11.8658	-12.3644	-12.8164	-13.0801	-13.1959	-13.3046	-13.4868	-13.6681	-13.8467	-14.0073	-14.1696	-14.3485	-14.5584	-14.7742	-14.9419	-15.1672	-15.3045	-15.5044	-15.8829	-16.3193	-16.5723	-16.9333	-17.0362	-17.0984	-17.6939
Species		AG4	AG5	AG6	AG7	AG8	AG9	AG10	AG11	AG12	AG13	AG14	AG15	AG16	AG17	AG18	AG19	AG20	AG21	AG22	AG23	AG24	AG25	AG26	AG27	AG28	AG29	AG30
AME		-9.37738	-10.3041	-11.0363	-11.6695	-12.2972	-12.8936	-13.4092	-14.0427	-14.5586	-14.7309	-14.4198	-16.0726	-18.0664	-18.3967	-18.4876	-18.5877	-19.1343	-19.9227	-19.9227	-19.9227	-21.5321	-21.5321	-20.4335	-20.1459	-20.4335	-21.5321	-20.1459
BGR		-10.1402	-11.8577	-12.8679	-13.593	-14.2364	-14.9081	-15.4971	-15.973	-16.1323	-16.514	-16.767	-17.0854	-17.5067	-17.7786	-18.0389	-18.3917	-18.7053	-18.8772	-19.3472	-20.0403	-19.7039	-20.9566	-20.9566	-21.6498	-20.5512	-21.6498	-21.6498
BTA		-10.1897	-11.891	-12.8972	-13.6414	-14.3121	-14.8773	-15.5162	-16.0676	-16.2907	-16.4513	-16.7176	-16.9839	-16.9754	-17.5351	-17.4641	-17.8425	-17.8227	-18.171	-18.2282	-18.5357	-19.1155	-18.9214	-19.6751	-19.6751	-20.3683	-20.3683	-19.9628
CAS		-10.206	-12.0241	-13.006	-13.7227	-14.2466	-14.7472	-15.176	-15.5197	-15.7879	-15.978	-16.1807	-16.3417	-16.4811	-16.5114	-16.7434	-16.8065	-16.7831	-16.9876	-16.9948	-17.273	-17.5926	-17.911	-18.1522	-18.5691	-19.046	-18.8009	-19.2973
CCR		-10.0747	-11.7579	-12.8133	-13.4525	-13.9554	-14.4763	-14.9879	-15.2956	-15.5103	-15.6305	-15.9206	-16.0125	-16.0846	-16.1316	-16.3533	-16.4073	-16.801	-16.7218	-16.9809	-16.9669	-17.4369	-17.3518	-17.6601	-17.6883	-18.1526	-18.5356	-18.471
CFA		-9.18868	-10.1345	-10.7424	-10.9828	-11.2691	-11.5856	-11.9012	-12.1951	-12.4218	-12.6074	-12.8285	-13.0849	-13.4042	-13.8301	-14.2255	-14.6278	-15.0854	-15.6017	-16.0312	-16.5918	-17.265	-17.858	-19.0307	-19.2931	-20.2094	-19.6498	-20.2094
CFE		-9.90504	-11.5981	-12.6295	-13.264	-13.8836	-14.4125	-14.9509	-15.4534	-15.4957	-15.9976	-16.2734	-16.6907	-17.0525	-17.0025	-17.648	-17.7716	-17.6716	-18.008	-18.0419	-18.7702	-18.7012	-18.7702	-19.4633	-19.3298	-19.212	-20.0229	-19.3298
CGR		-9.7115	-11.233	-12.0867	-12.6224	-13.0144	-13.419	-13.7214	-13.9605	-13.9501	-13.8801	-13.8709	-13.8917	-13.829	-13.7521	-13.6077	-13.3891	-13.1066	-13.2213	-13.5763	-13.7059	-13.8628	-14.0621	-14.3114	-14.6007	-14.912	-15.2696	-15.5962
CHI		-10.0969	-11.8226	-12.8699	-13.5882	-14.2472	-14.9578	-15.4816	-15.9619	-16.0402	-16.3969	-16.4681	-16.7711	-17.1278	-17.1843	-17.5443	-17.8774	-18.001	-18.5941	-18.7482	-18.5941	-18.6942	-19.6927	-19.5592	-19.1537	-19.5592	-20.9455	-19.4414
CHO		-9.83645	-11.0717	-12.4332	-13.2276	-13.8752	-14.492	-14.9574	-15.4112	-15.6206	-15.7631	-15.9332	-16.1188	-16.1788	-16.4562	-16.534	-16.6509	-16.6675	-16.8315	-16.6845	-17.0646	-17.0158	-16.9693	-17.0646	-16.9923	-17.2419	-17.3195	-17.4393
CJA		-9.97989	-11.5613	-12.4392	-13.0048	-13.5208	-13.9129	-14.2492	-14.4774	-14.7129	-14.9017	-15.1025	-15.2948	-15.461	-15.5959	-15.7344	-15.7878	-15.9217	-15.9276	-15.9737	-15.9397	-15.9928	-16.0188	-16.1046	-16.1561	-16.2345	-16.4628	-16.6178
CLA		-10.0121	-11.6449	-12.5016	-13.0732	-13.6253	-14.1169	-14.5027	-14.8413	-15.0317	-15.0832	-15.2467	-15.4269	-15.3693	-15.5091	-15.5629	-15.4996	-15.4879	-15.4335	-15.4073	-15.5479	-15.5455	-15.6385	-15.7533	-16.0563	-16.5726	-16.9146	-17.1799
CPO		-10.0054	-11.6273	-12.5023	-13.1026	-13.6538	-14.1242	-14.5585	-14.7911	-14.9623	-14.9706	-15.0334	-14.973	-14.9332	-14.9005	-14.8623	-14.7852	-14.6347	-14.4044	-14.4064	-14.4051	-14.5865	-14.8214	-15.1808	-15.5716	-15.8112	-16.4146	-16.6922
CSI		-9.76339	-11.4003	-12.4001	-13.1434	-13.8733	-14.5881	-15.1002	-15.5884	-15.8744	-16.3919	-16.5414	-16.7565	-17.2028	-17.4104	-17.474	-17.7136	-18.0883	-18.0295	-18.0013	-18.1508	-18.8122	-19.0199	-19.5054	-19.7931	-20.4862	-20.8917	-21.5848
DNO		-9.8927	-11.6965	-12.8432	-13.637	-14.3997	-15.0745	-15.633	-16.0451	-16.4365	-16.6861	-16.7992	-17.0809	-17.3021	-17.3528	-17.3846	-17.6405	-17.7583	-17.6977	-17.6977	-17.9659	-18.046	-18.1105	-18.133	-18.046	-18.2283	-18.3618	-18.8727
DOR		-9.83094	-11.298	-12.0137	-12.5346	-12.9026	-13.191	-13.5734	-13.8299	-14.0457	-14.2335	-14.3794	-14.5062	-14.7415	-14.9695	-15.1254	-15.2933	-15.4809	-15.68	-15.847	-16.1885	-16.3872	-16.3943	-16.7612	-16.8473	-17.0052	-17.2088	-17.4041
ECA		-9.79007	-11.467	-12.5393	-13.2907	-13.9929	-14.7201	-15.3191	-15.8116	-16.3024	-16.7665	-16.9102	-17.204	-17.7606	-17.8265	-17.9998	-18.0554	-18.5197	-18.7203	-18.7775	-19.8189	-19.2128	-19.8189	-19.8189	-20.5121	-19.6648	-20.2244	-20.2244
EED		-10.1271	-11.8233	-12.6907	-13.2217	-13.6712	-14.1125	-14.4795	-14.7968	-15.0656	-15.2538	-15.502	-15.7015	-15.7779	-15.9231	-16.1537	-16.2351	-16.3311	-16.454	-16.5607	-16.6287	-16.8161	-17.2681	-17.4447	-17.8616	-18.2085	-18.9776	-18.9776
EEU		-8.89114	-10.148	-10.8293	-11.2693	-11.6699	-12.0392	-12.4294	-12.7288	-12.9073	-13.0026	-13.1354	-13.238	-13.3716	-13.5103	-13.6833	-13.8734	-14.1772	-14.4998	-14.9679	-15.4114	-16.0816	-16.783	-17.6387	-18.1048	-18.435	-19.0856	-19.0856
EFU		-9.25949	-10.6923	-11.6373	-12.3128	-12.8681	-13.3057	-13.7251	-14.0035	-14.1873	-14.2901	-14.3514	-14.4037	-14.4319	-14.461	-14.3657	-14.2357	-14.0789	-13.9976	-13.9701	-14.0217	-14.3762	-14.6762	-15.0949	-15.5336	-15.9329	-16.654	-17.0408
ETE		-9.80658	-11.5168	-12.5357	-13.2073	-13.6818	-14.0635	-14.4309	-14.6376	-14.8662	-15.0607	-15.1557	-15.3636	-15.5671	-15.6943	-15.8489	-15.8607	-15.9507	-16.0496	-16.2558	-16.4338	-16.7829	-17.0756	-17.3903	-17.6734	-17.8966	-18.1843	-18.3486
FCA		-8.70163	-9.14528	-10.4812	-11.1488	-11.6952	-12.1043	-12.4589	-12.7247	-12.8923	-13.0138	-13.1447	-13.2635	-13.3256	-13.3774	-13.4209	-13.5289	-13.5302	-13.5827	-13.8123	-14.1752	-14.6611	-15.1524	-15.6176	-16.0192	-16.4363	-16.8653	-17.1178
GGO		-10.008	-11.5877	-12.4301	-13.0122	-13.5503	-14.0273	-14.3908	-14.7293	-15.0953	-15.5305	-15.9958	-16.2436	-16.4331	-16.7638	-16.909	-17.3666	-17.2612	-17.6179	-17.5866	-18.0474	-17.9998	-18.5029	-18.7165	-18.4652	-19.1961	-19.5638	-19.1961
HGL		-10.0595	-11.7142	-12.5633	-13.0925	-13.5898	-14.0109	-14.3466	-14.5012	-14.7437	-14.8126	-14.8668	-14.9668	-15.0628	-15.2065	-15.2169	-15.1329	-15.0779	-15.1961	-15.203	-15.3621	-15.4735	-15.5888	-15.8196	-16.3208	-16.6798	-17.2859	-17.5021
HSA		-9.93982	-11.5472	-12.3624	-12.9424	-13.4852	-13.957	-14.4236	-14.7717	-15.1252	-15.4363	-15.5748	-15.8196	-15.9717	-16.2737	-16.4001	-16.4176	-16.7693	-16.7383	-16.9403	-17.4074	-17.4562	-17.6041	-17.9064	-18.2547	-18.6193	-18.6193	-18.9478
JJA		-9.01501	-9.82085	-10.49	-10.9794	-11.4754	-11.9229	-12.3188	-12.6429	-12.8478	-13.0315	-13.2097	-13.3905	-13.5218	-13.6422	-13.7842	-13.9605	-14.0449	-14.1244	-14.2017	-14.3052	-14.6084	-15.0143	-15.4477	-15.8347	-16.1724	-16.4744	-16.6171
LAF		-9.88928	-11.5499	-12.6195	-13.3681	-14.1265	-14.8585	-15.648	-16.2117	-16.8978	-17.3947	-17.671	-18.1471	-18.7251	-18.9703	-19.0274	-19.3757	-20.2512	-19.6634	-20.0689	-20.762	-20.4743	-20.762	-21.8606	-20.2512	-21.8606	-21.1675	-20.762
LWE		-9.07081	-9.9748	-10.6416	-11.2245	-11.8427	-12.5215	-13.2569	-13.9315	-14.5977	-15.091	-15.6307	-16.0375	-16.6548	-17.2596	-17.7847	-18.3868	-18.4313	-18.8833	-19.9129	-20.8292	-19.7306	-20.4237	-21.5223	-21.5223	-21.5223	-21.5223	-21.5223
MAU		-9.69666	-11.1633	-12.033	-12.5892	-13.0851	-13.4857	-13.8617	-14.1422	-14.2717	-14.3919	-14.3808	-14.3859	-14.3272	-14.3615	-14.3065	-14.3557	-14.4814	-14.4031	-14.4074	-14.2709	-14.2963	-14.2455	-14.3216	-14.4937	-14.5788	-14.9498	-15.2002
MBR		-9.25435	-10.6505	-11.6326	-12.3026	-12.8939	-13.2765	-13.6036	-13.7894	-13.7434	-13.694	-13.6499	-13.6776	-13.8403	-13.8067	-13.785	-13.8346	-13.896	-14.0562	-14.3447	-14.8925	-15.4222	-16.1004	-16.8339	-17.204	-17.5168	-18.2306	-18.2732
MDA		-9.2829	-10.6823	-11.6113	-12.2633	-12.7943	-13.1986	-13.4886	-13.7241	-13.7048	-13.8707	-13.9963	-14.0034	-14.1624	-14.1798	-14.2545	-14.2054	-14.1276	-14.0884	-14.1952	-14.4378	-14.7082	-15.1221	-15.6375	-16.1396	-16.5183	-16.9725	-17.6169
MDO		-9.50614	-10.8402	-11.7019	-12.3087	-12.8322	-13.2997	-13.7408	-14.0621	-14.2671	-14.4428	-14.6482	-14.7049	-14.8547	-14.8466	-14.8909	-14.9284	-14.8834	-14.9302	-14.8859	-14.805	-14.7454	-14.6911	-14.6614	-14.5957	-14.5399	-14.5907	-14.5029
MEU		-9.57486	-11.1336	-11.9939	-12.6017	-13.1511	-13.6033	-13.9958	-14.27	-14.4854	-14.579	-14.6455	-14.6647	-14.821	-14.929	-14.9656	-14.9447	-15.0154	-14.9998	-14.9582	-15.0623	-14.9182	-14.8786	-14.8167	-14.7523	-14.8167	-14.7912	-14.821
MFA		-9.97148	-11.5068	-12.3199	-12.8513	-13.3399	-13.8017	-14.1675	-14.5904	-14.7799	-15.0598	-15.2426	-15.407	-15.591	-15.6906	-15.7831	-15.9705	-16.0146	-16.2654	-16.3653	-16.6364	-16.7776	-16.9422	-17.4369	-17.66	-18.1168	-18.4963	-18.5355
MFU		-9.05439	-9.78998	-10.6196	-11.1768	-11.7512	-12.2976	-12.8438	-13.2645	-13.6503	-13.972	-14.4334	-15.0215	-15.6276	-16.4651	-17.3569	-18.2884	-19.1486	-20.4479	-21.5465	-20.4479	-20.8534	-20.8534	-21.5465	-21.5465	-21.5465	-21.5465	-21.5465
MIM		-9.885	-11.537	-12.3829	-12.8705	-13.3691	-13.7196	-14.1234	-14.5373	-14.7288	-15.0346	-15.315	-15.3824	-15.5509	-15.6954	-15.7461	-15.7611	-15.9159	-15.9656	-15.9937	-16.0627	-16.1368	-16.1313	-16.291	-16.3369	-16.2974	-16.4505	-16.6404
MLU		-9.26279	-10.6484	-11.666	-12.379	-13.0054	-13.4893	-13.8733	-14.1538	-14.1617	-14.1119	-14.0652	-14.0548	-13.9783	-14.0013	-13.8765	-13.7565	-13.6549	-13.5232	-13.4787	-13.7546	-14.1425	-14.6878	-15.173	-15.6957	-16.4091	-16.69	-17.2886
MMS		-9.63383	-11.0915	-11.8217	-12.2999	-12.7534	-13.1198	-13.4728	-13.7281	-13.8036	-13.8313	-13.8543	-13.8787	-13.8771	-13.8373	-13.8384	-13.8047	-13.7499	-13.6926	-13.6509	-13.646	-13.6401	-13.7044	-13.7986	-13.9539	-14.0542	-14.2095	-14.4165
MMU		-9.94911	-11.5186	-12.3782	-12.9038	-13.3733	-13.8201	-14.2077	-14.6145	-14.8825	-15.1541	-15.4096	-15.5979	-15.7938	-15.9223	-16.1643	-16.5233	-16.6633	-16.9575	-17.4311	-17.9325	-18.1674	-18.7493	-19.4965	-19.1288	-20.0843	-19.902	-21.0006
MOC		-9.69399	-11.2794	-12.1696	-12.7577	-13.2878	-13.7402	-14.122	-14.4597	-14.5526	-14.6014	-14.6683	-14.6204	-14.5526	-14.4588	-14.4111	-14.1852	-14.0219	-13.7853	-13.6429	-13.4921	-13.5328	-13.5242	-13.7069	-13.8984	-14.2469	-14.7292	-15.275
NLE		-10.0024	-11.5928	-12.4125	-12.9849	-13.4652	-13.9136	-14.362	-14.6967	-14.9734	-15.3777	-15.7383	-16.0104	-16.3854	-16.5443	-16.8853	-17.1523	-17.1123	-17.4198	-17.7483	-18.0737	-18.4792	-19.1723	-19.9455	-19.5401	-19.6578	-20.6387	-21.0441
OAF		-10.1505	-11.8014	-12.7218	-13.2306	-13.6521	-14.0697	-14.4298	-14.6607	-14.9146	-15.0449	-15.2088	-15.4444	-15.7331	-15.9478	-16.3277	-16.4836	-16.8518	-17.1395	-17.6209	-18.214	-18.3963	-18.9559	-19.3867	-19.8722	-20.5654	-20.5654	-20.8531
OAN		-9.70177	-11.4239	-12.3983	-13.0664	-13.6397	-14.0832	-14.5742	-14.8889	-15.0924	-15.4319	-15.7288	-15.7855	-15.9455	-16.3929	-16.4518	-16.7599	-16.7807	-17.1005	-17.671	-17.3456	-17.5969	-18.2901	-18.8497	-18.6955	-18.6265	-18.9367	-20.236
OAR		-10.1119	-11.838	-12.9008	-13.6339	-14.2729	-14.9476	-15.3994	-15.8155	-15.9902	-16.2826	-16.6033	-16.9258	-17.1099	-17.0381	-17.2588	-17.702	-17.9155	-18.1268	-18.5177	-18.6575	-18.6575	-19.0883	-19.3506	-19.0141	-19.1683	-19.2553	-19.7073
OCU		-8.94057	-9.56116	-10.3622	-10.8371	-11.3081	-11.6899	-12.0341	-12.2861	-12.4002	-12.5236	-12.6727	-12.7529	-12.9124	-13.0698	-13.2781	-13.6418	-13.955	-14.3751	-14.8451	-15.3925	-16.0455	-16.775	-17.116	-17.8091	-18.79	-19.0413	-19.6009
ODE		-10.082	-11.7243	-12.6096	-13.2126	-13.7138	-14.1674	-14.5991	-14.851	-14.9432	-14.925	-14.9025	-14.9335	-14.8203	-14.6737	-14.5104	-14.288	-14.0653	-13.8086	-13.5968	-13.5729	-13.6602	-13.8853	-14.1821	-14.5385	-14.8873	-15.4098	-15.8786
OGA		-9.90343	-11.5505	-12.4498	-13.0566	-13.6045	-14.1328	-14.6454	-15.0596	-15.4121	-15.6901	-15.9119	-16.2834	-16.6259	-16.9866	-17.5042	-17.6899	-18.4037	-18.6914	-19.3845	-19.79	-20.4831	-20.8886	-20.8886	-20.4831	-21.5817	-20.8886	-21.5817
OOR		-9.93949	-11.5746	-12.672	-13.3291	-13.9182	-14.3888	-14.6578	-14.9506	-15.1288	-15.1849	-15.2706	-15.1866	-15.4938	-15.8302	-15.8269	-16.1774	-16.3924	-16.5853	-16.8612	-17.1902	-17.4565	-15.0342	-16.909	-18.3985	-18.7614	-19.3368	-19.5881
OPR		-9.62781	-10.9068	-11.6001	-12.144	-12.6435	-13.0496	-13.4303	-13.7107	-13.8571	-13.9832	-14.0897	-14.1766	-14.2856	-14.3302	-14.4586	-14.5747	-14.701	-14.8587	-15.0566	-15.372	-16.0082	-16.2944	-16.7153	-17.3106	-17.9224	-19.1909	-19.7787
ORO		-9.15552	-10.0328	-10.6687	-11.2471	-11.7514	-12.0766	-12.839	-13.4399	-13.99	-14.5725	-15.0595	-15.6294	-16.1053	-16.736	-17.1869	-17.4959	-17.9728	-18.2241	-18.6659	-18.9173	-19.2537	-19.6104	-20.17	-20.17	-20.17	-20.8632	-20.8632
PAB		-9.98488	-11.527	-12.3547	-12.9097	-13.4468	-13.9306	-14.4051	-14.814	-15.209	-15.5465	-15.796	-16.1795	-16.5153	-16.8094	-16.9853	-17.422	-17.6333	-18.0462	-18.5206	-18.9624	-18.9624	-19.4549	-19.6556	-19.3679	-20.2434	-21.1597	-20.4665
PAL		-9.86803	-11.5057	-12.493	-13.0802	-13.5203	-13.9798	-14.2073	-14.4983	-14.6968	-14.6772	-14.7918	-15.0503	-15.1945	-15.4461	-15.5112	-15.6785	-15.6206	-15.6206	-15.719	-15.813	-15.964	-16.1794	-16.365	-16.5291	-16.835	-17.1548	-17.5177
PAN		-9.99722	-11.5601	-12.4113	-12.9232	-13.4027	-13.8056	-14.2014	-14.4818	-14.7601	-15.0487	-15.2592	-15.4383	-15.7219	-15.8913	-16.1616	-16.2523	-16.4974	-16.5653	-16.775	-16.9259	-17.3198	-17.581	-17.7967	-18.0721	-18.7411	-19.3008	-19.3008
PCA		-10.1646	-11.9791	-13.027	-13.7432	-14.3264	-14.8099	-15.3275	-15.6914	-16.1685	-16.2599	-16.6118	-17.0379	-17.1024	-17.3396	-17.4751	-17.9647	-18.1683	-18.27	-18.8297	-19.1173	-18.9632	-19.2043	-19.2043	-20.2159	-20.2159	-19.8105	-19.6563
PHO		-10.1141	-11.8284	-12.8931	-13.6292	-14.2745	-14.9458	-15.5182	-15.8529	-16.0938	-16.2492	-16.7908	-16.8637	-16.9889	-17.3524	-17.5824	-18.0052	-18.1463	-18.5983	-19.0038	-18.9348	-19.1579	-19.5634	-19.5634	-19.4456	-20.2565	-20.5442	-20.9497
PPA		-9.97616	-11.5398	-12.3762	-12.9229	-13.4515	-13.9202	-14.3769	-14.7488	-15.0503	-15.5523	-15.7833	-16.2007	-16.3602	-16.6763	-16.7494	-17.0256	-17.1723	-17.2953	-17.6657	-17.7008	-17.9195	-18.1708	-18.1708	-18.1708	-18.468	-18.8929	-18.7304
PTR		-9.97867	-11.5482	-12.3726	-12.9124	-13.4592	-13.9368	-14.3925	-14.7422	-15.0955	-15.3902	-15.7849	-15.9717	-16.3378	-16.6951	-16.9525	-17.0703	-17.1444	-17.7284	-18.0046	-17.9602	-18.0046	-18.6978	-18.7931	-19.0162	-19.3039	-19.4862	-20.6902
PVA		-9.85113	-11.46	-12.4946	-13.11	-13.5318	-13.8406	-14.2596	-14.5128	-14.7154	-15.0431	-15.0675	-15.1507	-15.2621	-15.4749	-15.5676	-15.5771	-15.6629	-15.6527	-15.6391	-15.6425	-15.8732	-15.698	-15.7877	-15.8775	-15.8948	-15.9622	-16.0547
RNO		-9.67844	-11.2213	-12.0574	-12.589	-13.0616	-13.4757	-13.7871	-14.0143	-14.0699	-14.05	-14.055	-13.9826	-13.9294	-13.8458	-13.7518	-13.6402	-13.4896	-13.3593	-13.262	-13.223	-13.2924	-13.3886	-13.5721	-13.8058	-14.0476	-14.4169	-14.6976
SAR		-9.47739	-10.562	-11.6258	-12.3277	-12.8717	-13.3891	-13.7619	-13.9978	-14.0617	-14.1424	-14.2421	-14.2303	-14.2748	-14.2697	-14.2835	-14.2125	-14.2733	-14.3451	-14.4538	-14.6156	-14.7977	-14.8723	-15.0251	-15.2056	-15.426	-15.6138	-15.7493
SBO		-9.9458	-11.5392	-12.4296	-13.0345	-13.5302	-13.9148	-14.1914	-14.4781	-14.6237	-14.6228	-14.7226	-14.8213	-14.7824	-14.8804	-14.793	-14.8235	-14.7729	-14.9211	-15.1261	-15.4713	-16.0506	-16.6606	-17.456	-17.7592	-18.0195	-19.1455	-18.7972
SHA		-9.46262	-10.9897	-11.8679	-12.4323	-12.9472	-13.3315	-13.7838	-14.0257	-14.2294	-14.3315	-14.4068	-14.4223	-14.4337	-14.5133	-14.4632	-14.3723	-14.3528	-14.3389	-14.3418	-14.4632	-14.4836	-14.6521	-14.7742	-14.8713	-15.1408	-15.2856	-15.5743
SSC		-10.028	-11.5588	-12.4573	-13.0344	-13.5319	-14.0191	-14.5554	-15.0637	-15.3837	-15.6632	-15.8572	-16.0267	-16.2905	-16.3538	-16.7055	-16.7796	-16.9286	-17.1585	-17.1145	-17.2045	-17.4276	-17.7153	-17.7351	-18.0918	-18.0636	-18.389	-18.5561
STR		-9.80282	-11.3771	-12.1261	-12.5898	-12.9611	-13.367	-13.7417	-14.0435	-14.0988	-14.1838	-14.228	-14.2253	-14.304	-14.2306	-14.2267	-14.2273	-14.2538	-14.3487	-14.3384	-14.4325	-14.6092	-14.7344	-14.9449	-15.2348	-15.4211	-15.7379	-15.9626
TBE		-8.5081	-9.85139	-10.4716	-11.0043	-11.5295	-12.0362	-12.5266	-12.9256	-13.1723	-13.3622	-13.4678	-13.6415	-13.8548	-14.0582	-14.2975	-14.5693	-14.8851	-15.1085	-15.531	-15.8613	-16.4565	-16.6441	-17.1654	-17.5296	-17.5921	-18.2227	-18.5004
TMA		-9.86246	-11.5369	-12.469	-13.2536	-14.0515	-14.7758	-15.2679	-15.7087	-16.1397	-16.6178	-16.9796	-17.2645	-17.8298	-18.1583	-18.2453	-18.3406	-18.446	-19.0337	-19.0337	-19.2569	-19.4392	-19.5446	-20.6432	-19.7959	-20.6432	-21.7418	-20.3555
TSY		-10.0705	-11.6313	-12.4906	-13.0203	-13.52	-13.9464	-14.2404	-14.4463	-14.6048	-14.713	-14.8214	-14.9886	-15.0182	-15.126	-15.2453	-15.3468	-15.4825	-15.56	-15.5745	-15.7481	-15.7888	-16.118	-16.2246	-16.2782	-16.5217	-16.8221	-16.9463
TTR		-9.93306	-11.6159	-12.6444	-13.3157	-13.8731	-14.3274	-14.7361	-14.8932	-15.1041	-15.2316	-15.3536	-15.4972	-15.6841	-15.6301	-15.824	-15.9498	-16.1766	-16.3885	-16.4583	-16.573	-16.7828	-16.7996	-17.2395	-17.2135	-17.809	-17.7201	-17.9867
VPA		-9.91156	-11.6236	-12.6061	-13.2728	-13.8668	-14.4111	-14.8498	-15.2981	-15.748	-16.1224	-16.4444	-16.7366	-16.8701	-17.2066	-17.2807	-17.5233	-17.6484	-17.6049	-18.0211	-18.197	-18.4106	-18.747	-18.5647	-18.9702	-19.2579	-19.3756	-19.8456
Species		ATT4	ATT5	ATT6	ATT7	ATT8	ATT9	ATT10	ATT11	ATT12	ATT13	ATT14	ATT15	ATT16	ATT17	ATT18	ATT19	ATT20	ATT21	ATT22	ATT23	ATT24	ATT25	ATT26	ATT27	ATT28	ATT29	ATT30
AME		-12.5978	-13.7297	-14.4646	-14.9175	-15.7548	-16.4818	-16.7401	-18.9737	-19.5127	-19.5127	-19.8491	-20.0723	-20.36	-20.0723	-21.4586	-20.36	-19.8491	-19.5127	-20.7654	-20.7654	-21.4586	-20.36	-20.36	-21.4586	-21.4586	-21.4586	-20.7654
BGR		-12.7153	-14.0408	-15.2279	-16.4489	-17.8175	-18.6884	-19.4993	-20.1925	-20.1925	-20.8856	-21.5787	-21.5787	-21.5787	-21.5787	-21.5787	-21.5787	-21.5787	-21.5787	-21.5787	-21.5787	-21.5787	-21.5787	-21.5787	-21.5787	-21.5787	-21.5787	-21.5787
BTA		-12.7566	-14.0665	-15.2691	-16.3371	-17.5098	-18.4261	-19.1993	-19.1993	-20.2979	-20.5856	-20.9911	-21.6842	-21.6842	-21.6842	-21.6842	-21.6842	-21.6842	-21.6842	-21.6842	-21.6842	-21.6842	-21.6842	-21.6842	-21.6842	-21.6842	-21.6842	-21.6842
CAS		-12.656	-13.7665	-14.6611	-15.4284	-16.3617	-16.9357	-17.2479	-17.7041	-17.4685	-17.9312	-18.6849	-18.7275	-19.1549	-20.2536	-21.1698	-21.863	-21.863	-21.863	-21.863	-20.7644	-21.1698	-21.863	-21.863	-21.863	-21.863	-21.863	-21.863
CCR		-12.3584	-13.1581	-14.2302	-14.9791	-15.7401	-16.2716	-16.5251	-16.9353	-17.2982	-17.5585	-17.9914	-17.8736	-18.3969	-18.2791	-18.5304	-19.2235	-19.09	-19.2235	-19.7832	-19.56	-19.7832	-20.4763	-20.4763	-21.1694	-21.1694	-21.1694	-21.1694
CFA		-12.4005	-13.5897	-14.5289	-15.1375	-15.6461	-15.7372	-15.8341	-15.6602	-15.7877	-15.9375	-16.3794	-17.3466	-18.4765	-20.1347	-20.1347	-21.521	-21.521	-21.521	-21.521	-21.521	-21.521	-21.521	-21.521	-21.521	-21.521	-21.521	-21.521
CFE		-12.614	-13.9631	-14.9104	-15.8299	-16.4008	-16.5069	-17.1921	-17.4232	-17.1011	-17.3099	-17.4034	-17.3649	-17.3649	-17.5066	-17.7243	-17.7243	-18.003	-18.1997	-18.3395	-19.0326	-18.9373	-19.5435	-19.2558	-19.3893	-20.2366	-19.7258	-19.9489
CGR		-12.8703	-14.0678	-15.0197	-15.5805	-15.8338	-15.7896	-15.6826	-15.3875	-15.0865	-14.9456	-15.0244	-15.7441	-16.2818	-17.0424	-17.6901	-18.4057	-19.0118	-19.5508	-19.705	-19.8873	-19.8873	-20.1104	-19.4173	-19.705	-19.705	-19.2995	-20.1104
CHI		-12.7354	-14.0662	-15.1877	-16.2746	-16.8765	-17.879	-18.3898	-19.2653	-19.17	-20.4693	-20.1816	-20.1816	-19.9584	-21.5679	-21.5679	-21.5679	-21.5679	-21.5679	-21.5679	-21.5679	-21.5679	-20.8747	-21.5679	-21.5679	-21.5679	-21.5679	-21.5679
CHO		-12.5797	-13.9625	-14.9474	-15.7171	-16.4137	-16.7085	-17.0998	-17.2682	-17.6736	-17.4913	-17.8361	-17.866	-18.1044	-18.4181	-19.1653	-19.9762	-21.3625	-21.3625	-21.3625	-21.3625	-21.3625	-21.3625	-21.3625	-21.3625	-21.3625	-21.3625	-21.3625
CJA		-12.4025	-13.4501	-14.2418	-15.0091	-15.5413	-16.2658	-16.5596	-17.0443	-17.5651	-18.1629	-20.2731	-20.9663	-21.6594	-21.6594	-21.6594	-21.6594	-21.6594	-21.6594	-21.6594	-21.6594	-21.6594	-21.6594	-21.6594	-21.6594	-21.6594	-21.6594	-21.6594
CLA		-12.812	-13.9558	-14.6973	-15.455	-15.9954	-16.3286	-16.7939	-16.8126	-16.7847	-17.1586	-17.7384	-18.4315	-19.3966	-19.2788	-20.7829	-20.7829	-21.4761	-21.4761	-20.3775	-21.4761	-21.4761	-21.4761	-20.7829	-20.7829	-21.4761	-20.7829	-21.4761
CPO		-12.9208	-14.0691	-14.8365	-15.5687	-15.9625	-16.0571	-16.3272	-16.1407	-16.2976	-16.6767	-17.231	-18.7923	-20.016	-20.5269	-21.6255	-21.6255	-21.6255	-21.6255	-21.6255	-21.6255	-21.6255	-21.6255	-21.6255	-21.6255	-21.6255	-21.6255	-21.6255
CSI		-12.3633	-13.6418	-14.636	-15.5445	-16.3665	-17.0083	-17.5569	-17.7015	-18.1069	-18.4171	-18.4171	-18.6749	-19.3109	-19.8987	-21.5081	-20.815	-20.815	-20.815	-20.815	-21.5081	-21.5081	-21.5081	-21.5081	-21.5081	-21.5081	-21.5081	-21.5081
DNO		-12.3011	-13.4699	-14.7069	-15.6462	-16.4915	-16.9483	-17.3613	-18.2833	-18.4713	-18.6606	-19.3537	-19.4407	-20.74	-20.74	-21.8386	-21.8386	-21.8386	-21.8386	-21.8386	-21.8386	-21.8386	-21.8386	-21.8386	-21.8386	-21.8386	-21.8386	-21.8386
DOR		-12.5327	-13.507	-14.3599	-15.4736	-16.4822	-17.3184	-17.7731	-18.4971	-18.9671	-19.3237	-19.4779	-19.6602	-21.2696	-21.2696	-21.2696	-21.2696	-21.2696	-21.2696	-21.2696	-21.2696	-21.2696	-21.2696	-21.2696	-21.2696	-21.2696	-21.2696	-21.2696
ECA		-12.5886	-13.9466	-15.0192	-15.8809	-16.6694	-17.0371	-17.6657	-18.0106	-18.6465	-18.8289	-19.4575	-19.7452	-20.8438	-21.5369	-21.5369	-21.5369	-21.5369	-21.5369	-21.5369	-21.5369	-21.5369	-21.5369	-21.5369	-21.5369	-21.5369	-21.5369	-21.5369
EED		-12.49	-13.6284	-14.4692	-15.1376	-15.6566	-16.0539	-16.2597	-16.4951	-16.5894	-16.6595	-16.9566	-17.3583	-17.8579	-18.628	-19.0137	-19.6497	-19.282	-21.1538	-20.7483	-21.1538	-20.7483	-21.1538	-21.8469	-21.1538	-21.1538	-21.1538	-21.8469
EEU		-11.4518	-12.4468	-13.2574	-14.0502	-14.5149	-14.932	-15.3616	-15.7649	-15.7084	-15.9563	-16.0721	-16.3029	-16.7829	-17.5312	-18.1002	-19.1035	-20.1152	-20.1152	-21.5014	-20.4028	-21.5014	-21.5014	-21.5014	-20.4028	-21.5014	-21.5014	-21.5014
EFU		-12.4617	-13.8131	-14.7558	-15.2814	-15.6843	-15.8837	-15.8025	-15.879	-16.2545	-16.7451	-17.6614	-18.6059	-19.4532	-20.1463	-21.245	-21.245	-21.245	-21.245	-21.245	-20.5518	-21.245	-21.245	-21.245	-21.245	-21.245	-21.245	-21.245
ETE		-11.5794	-13.6942	-14.8969	-15.8266	-16.6437	-17.3231	-17.8069	-17.7015	-18.3177	-18.2813	-18.4355	-19.1286	-19.6676	-20.5149	-20.9204	-21.6135	-21.6135	-21.6135	-21.6135	-20.9204	-21.6135	-21.6135	-21.6135	-21.6135	-21.6135	-21.6135	-21.6135
FCA		-12.5815	-13.8323	-14.7032	-15.2985	-15.5424	-15.7681	-15.7335	-15.8516	-15.9428	-15.9738	-16.5766	-17.7044	-18.8721	-19.4317	-20.818	-20.818	-20.818	-20.4125	-21.5111	-21.5111	-20.818	-21.5111	-21.5111	-21.5111	-21.5111	-21.5111	-21.5111
GGO		-12.3028	-13.2735	-13.9549	-14.6276	-15.1863	-15.9909	-16.2422	-16.4429	-16.4861	-16.6284	-16.8094	-17.3539	-17.9957	-18.4658	-19.8929	-21.6846	-21.6846	-20.9915	-21.6846	-20.9915	-21.6846	-21.6846	-21.6846	-21.6846	-21.6846	-21.6846	-21.6846
HGL		-12.7235	-13.8943	-14.6511	-15.2361	-15.6008	-16.0076	-16.2477	-16.4471	-16.6399	-17.0897	-17.2646	-17.8205	-18.5397	-19.4047	-19.6923	-20.0978	-21.4841	-20.791	-21.4841	-20.791	-21.4841	-20.791	-21.4841	-21.4841	-21.4841	-21.4841	-21.4841
HSA		-12.2692	-13.1902	-13.9598	-14.6248	-15.2196	-15.664	-15.9185	-16.2014	-16.0483	-16.1861	-16.1201	-16.5046	-17.1771	-17.7547	-19.4595	-20.3758	-21.0689	-21.762	-21.762	-21.762	-21.762	-21.762	-21.762	-21.762	-21.762	-21.762	-21.762
JJA		-12.2707	-13.2249	-13.9751	-14.7205	-15.3245	-15.8288	-16.0098	-16.0374	-16.0783	-16.1698	-16.5617	-17.093	-17.7303	-18.994	-20.8658	-20.4603	-20.1726	-20.8658	-20.4603	-21.5589	-21.5589	-20.4603	-20.8658	-21.5589	-20.8658	-21.5589	-21.5589
LAF		-12.4987	-13.7829	-15.3168	-16.7314	-17.8558	-18.8432	-19.3027	-19.2227	-19.485	-19.485	-19.3027	-19.5904	-19.3027	-19.2227	-19.8417	-20.689	-20.1782	-19.8417	-20.689	-21.0945	-20.689	-21.7876	-21.0945	-21.7876	-21.7876	-21.7876	-21.7876
LWE		-12.508	-13.6584	-14.5361	-15.321	-15.7814	-16.2167	-16.7474	-17.0784	-17.2889	-17.2889	-17.7102	-18.5575	-20.7547	-20.0615	-20.7547	-21.4478	-21.4478	-21.4478	-21.4478	-21.4478	-21.4478	-21.4478	-21.4478	-21.4478	-20.7547	-21.4478	-21.4478
MAU		-12.8693	-13.9376	-14.7068	-15.4555	-15.9716	-16.1673	-16.4461	-16.5919	-16.7149	-16.5919	-16.8879	-17.7241	-17.8042	-18.1688	-19.0851	-19.7783	-20.0014	-20.6946	-20.6946	-21.3877	-20.6946	-21.3877	-21.3877	-21.3877	-21.3877	-20.6946	-20.6946
MBR		-12.4508	-13.7293	-14.6263	-15.2398	-15.3669	-15.5673	-15.7944	-16.3728	-17.0872	-18.2446	-19.5439	-20.6425	-20.6425	-21.3357	-20.6425	-21.3357	-21.3357	-20.6425	-21.3357	-21.3357	-21.3357	-21.3357	-21.3357	-21.3357	-20.237	-21.3357	-21.3357
MDA		-12.462	-13.7194	-14.5826	-15.2206	-15.3289	-15.5423	-15.9591	-16.3768	-17.0924	-17.3503	-18.104	-19.0849	-21.2821	-20.1835	-21.2821	-21.2821	-21.2821	-21.2821	-21.2821	-21.2821	-21.2821	-21.2821	-20.5889	-21.2821	-21.2821	-20.5889	-20.5889
MDO		-12.0363	-13.3403	-14.2119	-15.0227	-15.6098	-16.0634	-16.3143	-16.688	-16.952	-17.2231	-17.7276	-17.6968	-18.3601	-18.5192	-19.0533	-19.807	-19.4016	-20.7879	-20.2771	-21.1933	-21.8865	-21.8865	-21.8865	-21.8865	-21.8865	-21.8865	-21.8865
MEU		-12.3508	-14.0451	-15.3623	-16.2548	-17.0191	-17.5476	-18.0176	-18.1072	-18.4819	-18.2771	-18.8649	-19.4935	-18.8649	-19.627	-19.7812	-20.8798	-19.627	-20.8798	-21.5729	-20.4743	-21.5729	-21.5729	-21.5729	-21.5729	-21.5729	-21.5729	-21.5729
MFA		-12.0681	-13.0911	-13.8285	-14.4495	-15.0572	-15.3815	-15.6896	-15.9228	-16.0402	-16.5369	-17.1788	-18.2774	-19.7327	-20.0691	-21.6786	-20.9854	-21.6786	-21.6786	-21.6786	-21.6786	-21.6786	-21.6786	-21.6786	-21.6786	-21.6786	-21.6786	-21.6786
MFU		-12.4599	-13.5922	-14.3473	-14.9872	-15.3798	-15.8386	-16.4045	-16.8484	-17.6447	-18.3823	-19.3939	-20.7802	-21.4734	-21.4734	-21.4734	-21.4734	-21.4734	-21.4734	-21.4734	-21.4734	-21.4734	-21.4734	-21.4734	-21.4734	-21.4734	-21.4734	-21.4734
MIM		-12.4635	-13.567	-14.5085	-15.2967	-16.1355	-17.1546	-17.6279	-18.0466	-18.7005	-19.8791	-18.9629	-19.8791	-21.2654	-21.2654	-21.2654	-21.2654	-21.2654	-21.2654	-21.2654	-21.2654	-21.2654	-21.2654	-21.2654	-21.2654	-21.2654	-21.2654	-21.2654
MLU		-12.4806	-13.7547	-14.6942	-15.3808	-15.4401	-15.5579	-15.695	-15.8925	-16.2448	-16.7829	-17.925	-19.0236	-20.6331	-21.3262	-21.3262	-21.3262	-20.6331	-21.3262	-21.3262	-20.6331	-21.3262	-21.3262	-20.6331	-20.6331	-21.3262	-21.3262	-21.3262
MMS		-12.7291	-13.7563	-14.5511	-15.1519	-15.3298	-15.4371	-15.4511	-15.3606	-15.4001	-15.3717	-15.3905	-15.5485	-15.9473	-16.5338	-16.9041	-17.4681	-18.1024	-18.8245	-19.5783	-19.866	-19.4605	-20.9646	-21.6577	-21.6577	-21.6577	-21.6577	-21.6577
MMU		-12.1423	-13.1274	-13.8284	-14.5031	-15.1785	-15.6883	-16.4139	-16.9832	-17.2741	-17.9543	-18.399	-18.9788	-19.8261	-20.0084	-19.8261	-19.5384	-19.3153	-18.9788	-19.5384	-19.0529	-19.22	-18.8453	-19.133	-19.3153	-19.3153	-20.0084	-19.8261
MOC		-12.7168	-13.7564	-14.7036	-15.3955	-15.9296	-16.3714	-16.4531	-16.352	-16.3979	-16.3714	-16.1391	-16.2779	-16.3912	-16.5897	-17.0844	-17.5306	-17.7383	-18.2238	-19.2046	-20.0155	-20.3032	-20.3032	-20.7087	-20.0155	-21.4018	-20.3032	-20.7087
NLE		-12.2637	-13.2142	-13.9076	-14.5774	-15.2103	-15.8029	-16.0189	-16.176	-16.5133	-16.5794	-17.1069	-17.5664	-18.3286	-19.869	-20.9676	-20.9676	-21.6608	-21.6608	-21.6608	-21.6608	-21.6608	-21.6608	-21.6608	-21.6608	-21.6608	-21.6608	-21.6608
OAF		-12.1258	-12.9913	-13.7591	-14.5411	-15.2271	-15.8007	-16.2926	-16.6343	-17.0478	-17.3763	-17.9058	-18.698	-19.237	-20.4898	-20.7775	-20.7775	-21.8761	-21.8761	-21.8761	-21.8761	-21.8761	-21.1829	-21.8761	-21.8761	-21.8761	-21.8761	-21.8761
OAN		-9.77746	-10.404	-11.0796	-11.9627	-12.8412	-13.5493	-14.3289	-14.9012	-15.4965	-16.3223	-16.7824	-17.8371	-17.9752	-19.1916	-19.6616	-21.2711	-19.6616	-21.2711	-21.2711	-20.5779	-21.2711	-21.2711	-21.2711	-21.2711	-21.2711	-21.2711	-21.2711
OAR		-12.7467	-14.1257	-15.2424	-16.2029	-17.0289	-17.7986	-18.4473	-18.4917	-19.0979	-19.791	-20.1965	-20.4841	-21.5828	-21.5828	-21.5828	-21.5828	-21.5828	-20.8896	-20.8896	-21.5828	-21.5828	-21.5828	-21.5828	-21.5828	-21.5828	-21.5828	-20.8896
OCU		-12.9246	-14.0912	-14.836	-15.4471	-15.9461	-16.4827	-17.0276	-17.5521	-17.949	-19.2147	-19.8208	-21.6126	-20.9194	-21.6126	-21.6126	-21.6126	-21.6126	-21.6126	-21.6126	-21.6126	-21.6126	-21.6126	-21.6126	-21.6126	-21.6126	-21.6126	-21.6126
ODE		-12.635	-13.6371	-14.3916	-14.8745	-15.0224	-15.0734	-15.0324	-15.0338	-15.1676	-15.44	-15.9646	-16.8682	-17.7491	-18.7445	-19.0928	-19.4983	-19.786	-20.4791	-21.5777	-20.8846	-20.8846	-21.5777	-20.4791	-21.5777	-20.8846	-20.8846	-21.5777
OGA		-12.3334	-13.285	-14.1443	-14.9494	-15.8274	-16.8826	-18.5119	-19.3104	-20.8145	-21.5076	-21.5076	-21.5076	-21.5076	-21.5076	-21.5076	-21.5076	-21.5076	-21.5076	-21.5076	-21.5076	-21.5076	-21.5076	-21.5076	-21.5076	-21.5076	-21.5076	-21.5076
OOR		-12.4087	-13.7	-14.8467	-15.8917	-16.9062	-17.8765	-18.2412	-18.8951	-20.7669	-19.8506	-19.0622	-19.1575	-20.7669	-19.8506	-20.3614	-20.7669	-20.7669	-21.4601	-21.4601	-21.4601	-21.4601	-21.4601	-21.4601	-21.4601	-21.4601	-21.4601	-21.4601
OPR		-12.5001	-13.568	-14.4584	-15.0259	-15.5718	-15.9007	-16.1679	-16.2336	-16.6027	-17.2269	-17.92	-18.6132	-19.9349	-20.6281	-21.3212	-20.2226	-21.3212	-21.3212	-21.3212	-21.3212	-21.3212	-21.3212	-21.3212	-21.3212	-21.3212	-21.3212	-21.3212
ORO		-12.581	-13.7543	-14.6456	-15.3882	-16.0053	-16.432	-16.982	-17.2623	-17.5698	-17.7929	-18.3908	-19.2846	-20.7887	-21.4818	-21.4818	-21.4818	-21.4818	-21.4818	-21.4818	-21.4818	-21.4818	-21.4818	-21.4818	-21.4818	-21.4818	-21.4818	-21.4818
PAB		-12.1766	-13.0862	-13.6251	-14.1204	-14.4614	-14.8991	-15.3537	-15.6183	-15.8782	-16.2419	-16.6633	-17.1406	-18.1377	-19.0673	-19.2904	-21.7753	-21.7753	-21.7753	-21.7753	-21.7753	-21.7753	-21.7753	-21.7753	-21.7753	-21.7753	-21.7753	-21.7753
PAL		-12.3634	-13.644	-14.5028	-15.142	-15.5236	-15.8143	-15.9275	-16.3035	-16.7641	-16.7327	-17.2644	-18.1719	-18.6684	-20.2088	-20.2088	-21.3074	-21.3074	-21.3074	-21.3074	-21.3074	-20.2088	-21.3074	-20.6143	-21.3074	-21.3074	-21.3074	-21.3074
PAN		-12.0139	-13.1549	-13.8509	-14.5368	-15.0261	-15.4961	-15.8081	-15.873	-16.1235	-16.448	-16.8744	-17.8189	-19.3128	-20.6121	-21.0176	-21.7107	-21.7107	-21.7107	-21.7107	-21.7107	-21.7107	-21.7107	-21.7107	-21.7107	-21.7107	-21.7107	-21.7107
PCA		-12.7966	-13.917	-14.9643	-16.1177	-17.1771	-18.1326	-18.7612	-19.3365	-19.742	-20.4352	-20.1475	-20.4352	-20.8406	-20.8406	-20.4352	-21.5338	-20.8406	-20.4352	-20.8406	-20.4352	-21.5338	-21.5338	-21.5338	-21.5338	-21.5338	-21.5338	-21.5338
PHO		-12.7154	-14.0047	-15.2182	-16.2207	-17.2288	-17.935	-18.5281	-18.8	-19.7808	-19.7808	-21.5726	-20.8795	-21.5726	-21.5726	-21.5726	-21.5726	-21.5726	-21.5726	-21.5726	-21.5726	-21.5726	-21.5726	-21.5726	-21.5726	-21.5726	-21.5726	-21.5726
PPA		-12.2528	-13.2243	-13.9271	-14.6404	-15.1108	-15.5155	-15.6574	-16.0177	-16.2239	-16.5014	-16.9304	-17.96	-18.5134	-20.9557	-20.9557	-21.6489	-21.6489	-21.6489	-21.6489	-21.6489	-21.6489	-21.6489	-21.6489	-21.6489	-21.6489	-21.6489	-21.6489
PTR		-12.2497	-13.2127	-13.9779	-14.6115	-15.0561	-15.4674	-15.7505	-15.988	-16.0556	-16.1664	-16.6877	-17.7042	-18.8212	-21.0184	-20.6129	-21.7115	-21.7115	-21.7115	-21.7115	-21.7115	-21.7115	-21.7115	-21.7115	-21.7115	-21.7115	-21.7115	-21.7115
PVA		-12.4008	-13.7397	-14.5515	-15.3388	-15.7469	-15.8451	-16.0158	-16.0875	-15.9793	-16.1585	-16.1403	-17.0038	-17.6688	-18.6873	-19.4605	-19.6428	-21.2523	-21.2523	-21.2523	-21.2523	-21.2523	-21.2523	-21.2523	-21.2523	-21.2523	-21.2523	-21.2523
RNO		-13.0101	-14.2343	-15.0472	-15.6365	-15.7055	-15.7737	-15.673	-15.509	-15.3565	-15.2729	-15.2552	-15.5411	-15.8281	-16.4493	-17.2719	-18.0473	-18.6069	-19.6567	-21.6026	-20.9095	-21.6026	-21.6026	-20.9095	-21.6026	-21.6026	-21.6026	-21.6026
SAR		-12.4448	-13.3951	-14.0192	-14.486	-14.9132	-15.1965	-15.463	-15.5451	-15.8056	-15.9355	-16.0569	-16.5023	-16.937	-17.0673	-17.6756	-18.5464	-19.8273	-20.0505	-19.8273	-20.7436	-21.4368	-20.3382	-21.4368	-20.3382	-21.4368	-21.4368	-21.4368
SBO		-12.3541	-13.4024	-14.1476	-14.7321	-15.2139	-15.5069	-15.7522	-15.9267	-16.1883	-16.5109	-17.46	-18.8463	-20.4557	-21.5543	-21.5543	-21.5543	-20.8612	-21.5543	-21.5543	-21.5543	-21.5543	-21.5543	-21.5543	-21.5543	-21.5543	-21.5543	-21.5543
SHA		-11.7862	-12.9111	-13.7616	-14.6507	-15.3344	-15.95	-16.5786	-16.8427	-17.3458	-17.3985	-17.7513	-18.4837	-19.1376	-19.6231	-20.3162	-21.7025	-21.7025	-21.7025	-21.7025	-21.7025	-21.7025	-21.7025	-21.7025	-21.7025	-21.7025	-21.7025	-21.7025
SSC		-12.3651	-13.3707	-14.0773	-14.7878	-15.3412	-16.0422	-16.4051	-16.6058	-16.9217	-17.043	-17.2852	-18.0493	-18.3175	-19.0907	-19.7839	-20.477	-21.5756	-21.5756	-21.5756	-21.5756	-21.5756	-21.5756	-21.5756	-21.5756	-21.5756	-21.5756	-21.5756
STR		-12.3286	-13.3578	-14.1361	-14.6646	-15.1137	-15.4938	-15.8138	-15.9789	-15.983	-16.0079	-16.2072	-16.3926	-16.5749	-16.9916	-17.609	-18.3892	-19.1776	-19.0823	-20.3816	-20.3816	-21.4802	-21.4802	-21.4802	-21.4802	-21.4802	-21.4802	-21.4802
TBE		-11.3287	-12.2177	-13.1769	-13.9776	-14.5953	-15.0984	-15.5255	-15.8016	-16.0422	-16.4551	-16.844	-17.6227	-18.557	-19.0831	-20.5494	-20.2617	-20.2617	-20.2617	-20.9549	-20.9549	-20.5494	-20.5494	-20.5494	-21.648	-20.2617	-20.9549	-21.648
TMA		-12.4351	-13.6881	-15.0143	-16.3357	-17.4788	-18.5329	-18.9604	-21.6684	-19.3658	-21.6684	-20.5698	-21.6684	-20.9753	-21.6684	-21.6684	-21.6684	-21.6684	-21.6684	-21.6684	-21.6684	-21.6684	-21.6684	-21.6684	-21.6684	-21.6684	-21.6684	-21.6684
TSY		-12.1665	-13.3096	-14.0414	-14.5834	-15.2011	-15.6686	-16.1292	-16.4208	-16.9004	-17.1967	-17.4729	-17.9249	-19.0235	-19.8708	-20.9694	-20.564	-21.6626	-21.6626	-21.6626	-21.6626	-21.6626	-21.6626	-21.6626	-21.6626	-21.6626	-21.6626	-21.6626
TTR		-12.4303	-13.7464	-14.8707	-15.8916	-17.0201	-17.9711	-18.2786	-18.7894	-19.0995	-19.0125	-20.1111	-20.3988	-20.8043	-20.3988	-20.1111	-20.3988	-21.4974	-20.3988	-21.4974	-21.4974	-21.4974	-21.4974	-21.4974	-21.4974	-21.4974	-21.4974	-21.4974
VPA		-12.6718	-13.9969	-14.9567	-15.8968	-16.4117	-16.7276	-16.9389	-17.0641	-16.9995	-16.7864	-16.7764	-16.7966	-16.8383	-16.9627	-17.5529	-17.5974	-18.1235	-18.337	-18.9837	-18.8966	-19.3021	-20.6884	-20.6884	-20.6884	-21.3816	-21.3816	-21.3816
Species		AAC4	AAC5	AAC6	AAC7	AAC8	AAC9	AAC10	AAC11	AAC12	AAC13	AAC14	AAC15	AAC16	AAC17	AAC18	AAC19	AAC20	AAC21	AAC22	AAC23	AAC24	AAC25	AAC26	AAC27	AAC28	AAC29	AAC30
AME		-12.8344	-13.6908	-14.4102	-15.05	-15.8529	-16.346	-16.7603	-20.1014	-21.4877	-20.7946	-21.4877	-21.4877	-21.4877	-21.4877	-21.4877	-21.4877	-21.4877	-20.7946	-21.4877	-20.7946	-21.4877	-21.4877	-21.4877	-21.4877	-21.4877	-21.4877	-21.4877
BGR		-12.38	-13.7735	-14.9587	-15.9811	-16.8093	-18.1711	-19.5256	-19.8133	-20.5065	-20.9119	-21.6051	-21.6051	-21.6051	-21.6051	-21.6051	-21.6051	-21.6051	-20.9119	-21.6051	-21.6051	-21.6051	-21.6051	-21.6051	-21.6051	-21.6051	-21.6051	-20.9119
BTA		-12.4526	-13.8425	-15.052	-16.1925	-17.2214	-18.0211	-18.3778	-19.145	-19.5128	-20.6114	-21.0168	-21.0168	-21.71	-21.71	-21.71	-21.71	-21.71	-21.71	-21.71	-21.71	-21.71	-21.71	-21.71	-21.71	-21.71	-21.71	-21.71
CAS		-9.60205	-10.415	-11.4054	-12.4876	-13.4629	-14.2718	-15.0033	-15.661	-16.1679	-16.6887	-17.2372	-17.7545	-18.6627	-19.1736	-19.9357	-21.1885	-21.1885	-21.8816	-21.8816	-21.8816	-21.8816	-21.8816	-21.8816	-21.8816	-21.8816	-21.8816	-21.8816
CCR		-13.1414	-14.1219	-14.9513	-15.6387	-16.4544	-17.4382	-18.309	-19.2535	-19.2535	-19.8131	-20.5062	-20.5062	-21.1994	-21.1994	-21.1994	-21.1994	-21.1994	-20.5062	-21.1994	-21.1994	-21.1994	-21.1994	-21.1994	-21.1994	-21.1994	-21.1994	-21.1994
CFA		-12.8481	-13.6816	-14.3701	-14.9588	-15.6506	-16.0199	-16.6406	-17.01	-17.4424	-17.8156	-18.5575	-20.167	-20.4546	-21.5532	-21.5532	-21.5532	-21.5532	-21.5532	-21.5532	-21.5532	-21.5532	-21.5532	-21.5532	-21.5532	-21.5532	-21.5532	-21.5532
CFE		-13.0973	-14.0828	-14.8989	-15.5493	-16.1217	-16.6273	-17.1738	-17.303	-18.0312	-17.8371	-17.9623	-18.1854	-18.3189	-18.5302	-19.0609	-20.6703	-19.9772	-20.6703	-21.3635	-21.3635	-21.3635	-20.6703	-21.3635	-20.6703	-21.3635	-21.3635	-21.3635
CGR		-12.3407	-13.1966	-13.9598	-14.665	-15.2898	-15.8347	-16.2608	-16.5077	-16.9644	-17.1363	-17.6265	-18.6851	-19.0334	-19.3211	-19.9089	-20.4197	-20.4197	-21.5183	-20.8252	-21.5183	-20.8252	-20.8252	-20.4197	-21.5183	-20.8252	-21.5183	-21.5183
CHI		-12.4516	-13.7913	-14.7728	-15.6723	-16.4522	-17.04	-17.9303	-18.7607	-19.3967	-20.2076	-20.9007	-20.4953	-21.5939	-21.5939	-21.5939	-21.5939	-21.5939	-21.5939	-21.5939	-20.9007	-21.5939	-21.5939	-21.5939	-21.5939	-21.5939	-21.5939	-20.9007
CHO		-13.1525	-14.164	-15.0307	-16.0283	-16.6985	-17.4286	-18.0667	-18.6909	-18.7599	-19.6072	-20.0126	-21.3989	-20.7058	-21.3989	-21.3989	-21.3989	-21.3989	-21.3989	-21.3989	-21.3989	-21.3989	-21.3989	-21.3989	-21.3989	-21.3989	-21.3989	-21.3989
CJA		-12.8406	-13.7742	-14.6554	-15.478	-16.2835	-16.8465	-17.8405	-18.2249	-18.8574	-18.8574	-19.3881	-19.6112	-20.592	-20.3044	-21.6906	-21.6906	-21.6906	-21.6906	-21.6906	-21.6906	-21.6906	-21.6906	-21.6906	-21.6906	-21.6906	-21.6906	-21.6906
CLA		-12.9313	-13.8885	-14.8159	-15.6695	-16.4105	-17.1868	-17.7907	-19.0194	-18.7962	-20.8111	-20.4057	-20.4057	-20.8111	-21.5043	-21.5043	-21.5043	-21.5043	-21.5043	-21.5043	-21.5043	-21.5043	-21.5043	-21.5043	-21.5043	-21.5043	-21.5043	-21.5043
CPO		-13.0465	-13.9325	-14.7659	-15.5697	-16.0997	-16.7077	-16.9743	-17.6675	-17.7445	-18.1907	-18.521	-20.047	-20.2702	-21.6565	-21.6565	-21.6565	-21.6565	-21.6565	-21.6565	-21.6565	-21.6565	-21.6565	-21.6565	-21.6565	-21.6565	-21.6565	-21.6565
CSI		-13.0628	-14.3352	-15.5404	-16.7031	-17.445	-18.1721	-18.9744	-19.7476	-19.7476	-20.4408	-20.8462	-21.5394	-21.5394	-21.5394	-21.5394	-21.5394	-21.5394	-21.5394	-21.5394	-21.5394	-21.5394	-21.5394	-21.5394	-21.5394	-21.5394	-21.5394	-21.5394
DNO		-12.6993	-13.7674	-14.6915	-15.609	-16.5158	-17.2874	-17.9604	-18.8279	-20.0806	-20.2629	-20.2629	-21.8724	-21.1792	-20.7738	-21.8724	-21.8724	-21.8724	-21.8724	-21.8724	-21.8724	-21.8724	-21.8724	-21.8724	-21.8724	-21.8724	-21.8724	-21.8724
DOR		-11.9752	-12.8978	-13.9465	-15.0933	-16.2312	-17.4871	-18.5857	-19.9075	-20.1952	-20.6006	-21.2938	-21.2938	-21.2938	-21.2938	-21.2938	-21.2938	-21.2938	-21.2938	-21.2938	-21.2938	-21.2938	-21.2938	-21.2938	-21.2938	-21.2938	-21.2938	-21.2938
ECA		-13.3845	-14.6573	-15.8253	-16.8922	-17.8515	-18.857	-19.2625	-19.7733	-20.8719	-20.4665	-21.5651	-21.5651	-21.5651	-21.5651	-21.5651	-21.5651	-21.5651	-21.5651	-21.5651	-21.5651	-21.5651	-21.5651	-21.5651	-21.5651	-21.5651	-21.5651	-21.5651
EED		-10.2666	-10.87	-11.711	-12.5491	-13.2816	-13.9077	-14.4189	-14.9863	-15.447	-15.9238	-16.2551	-16.8679	-17.8114	-19.0386	-19.5693	-20.2624	-21.8719	-21.8719	-21.8719	-21.1787	-21.8719	-21.8719	-21.8719	-21.8719	-21.8719	-21.8719	-21.8719
EEU		-11.078	-12.3083	-13.429	-14.4809	-15.2624	-16.0705	-16.9206	-17.7881	-18.1936	-18.5814	-19.5799	-19.7341	-20.8327	-21.5258	-21.5258	-20.8327	-21.5258	-21.5258	-21.5258	-21.5258	-21.5258	-21.5258	-21.5258	-21.5258	-21.5258	-21.5258	-21.5258
EFU		-12.4632	-13.6102	-14.579	-15.2871	-15.9076	-16.4614	-16.9969	-17.4234	-17.8078	-17.9414	-18.2778	-20.1749	-20.5804	-21.2736	-21.2736	-21.2736	-21.2736	-21.2736	-21.2736	-21.2736	-21.2736	-21.2736	-21.2736	-21.2736	-21.2736	-21.2736	-21.2736
ETE		-12.0971	-13.1687	-13.8317	-14.4793	-15.1104	-15.6525	-16.3158	-16.8548	-17.3435	-17.6086	-18.0786	-18.5894	-19.688	-20.2476	-21.6339	-21.6339	-21.6339	-21.6339	-21.6339	-21.6339	-21.6339	-21.6339	-21.6339	-21.6339	-21.6339	-21.6339	-21.6339
FCA		-12.8005	-13.6438	-14.3064	-14.8715	-15.3159	-15.6805	-15.9072	-16.2009	-16.4325	-16.6709	-17.0841	-17.7318	-19.2359	-20.8453	-20.8453	-21.5385	-21.5385	-21.5385	-21.5385	-21.5385	-21.5385	-21.5385	-21.5385	-21.5385	-21.5385	-21.5385	-21.5385
GGO		-12.646	-13.4184	-14.0884	-14.7452	-15.3547	-16.2479	-16.9038	-17.3985	-18.0024	-18.1896	-17.9318	-18.282	-18.5379	-18.7715	-19.9242	-21.716	-21.716	-21.716	-21.716	-21.716	-21.716	-21.716	-21.716	-21.716	-21.716	-21.716	-21.716
HGL		-12.8649	-13.7682	-14.5314	-15.1211	-15.8516	-16.2869	-16.9854	-17.2985	-17.9626	-17.9916	-18.6848	-19.5721	-19.9085	-21.518	-20.8248	-21.518	-21.518	-21.518	-21.518	-21.518	-21.518	-21.518	-21.518	-21.518	-21.518	-21.518	-21.518
HSA		-12.5954	-13.3662	-14.1336	-14.8044	-15.5237	-16.0595	-16.5833	-17.0479	-17.5443	-17.8038	-18.1039	-18.4255	-19.8469	-20.1834	-20.6942	-21.7928	-21.7928	-21.7928	-21.7928	-21.7928	-21.7928	-21.7928	-21.7928	-21.7928	-21.7928	-21.7928	-21.7928
JJA		-12.0934	-12.9172	-13.8962	-14.858	-15.6707	-16.5538	-17.0409	-17.8706	-18.6397	-18.8761	-19.1863	-19.9748	-20.1979	-21.5842	-21.5842	-21.5842	-21.5842	-21.5842	-21.5842	-21.5842	-21.5842	-21.5842	-21.5842	-21.5842	-21.5842	-21.5842	-21.5842
LAF		-11.3443	-12.4944	-13.9141	-15.2904	-16.4404	-17.429	-18.1735	-18.8666	-19.172	-19.5085	-19.172	-19.7316	-20.4247	-21.1179	-20.7124	-21.811	-21.811	-21.811	-21.811	-21.811	-21.811	-21.811	-21.811	-21.811	-21.811	-21.811	-21.811
LWE		-12.807	-13.6651	-14.4702	-15.1945	-15.9492	-16.904	-17.4713	-18.3006	-19.0808	-19.6869	-20.3801	-20.7855	-21.4787	-21.4787	-21.4787	-21.4787	-21.4787	-21.4787	-21.4787	-21.4787	-21.4787	-21.4787	-21.4787	-21.4787	-21.4787	-21.4787	-21.4787
MAU		-12.4395	-13.3809	-14.2885	-15.274	-16.1551	-17.0253	-17.5787	-18.7683	-19.0095	-20.0211	-20.3088	-20.7142	-21.4074	-21.4074	-21.4074	-21.4074	-21.4074	-21.4074	-21.4074	-21.4074	-21.4074	-21.4074	-21.4074	-21.4074	-21.4074	-21.4074	-21.4074
MBR		-12.4531	-13.6113	-14.6539	-15.6775	-16.4372	-17.1018	-17.8381	-18.5312	-19.1672	-19.0619	-19.755	-21.3645	-20.6713	-21.3645	-21.3645	-21.3645	-21.3645	-20.6713	-21.3645	-21.3645	-21.3645	-21.3645	-21.3645	-21.3645	-21.3645	-21.3645	-21.3645
MDA		-12.5493	-13.7178	-14.724	-15.8379	-16.7355	-17.5725	-18.477	-18.5376	-19.3643	-19.9239	-19.5184	-21.3102	-21.3102	-21.3102	-20.617	-21.3102	-21.3102	-21.3102	-21.3102	-21.3102	-21.3102	-21.3102	-21.3102	-21.3102	-21.3102	-21.3102	-21.3102
MDO		-12.7923	-13.7907	-14.6194	-15.3239	-16.0542	-16.5896	-17.2045	-17.6692	-17.9807	-18.6738	-18.7539	-18.7964	-19.1593	-19.6293	-19.6293	-19.986	-19.7347	-19.986	-19.8525	-19.986	-19.8525	-20.3225	-19.986	-21.2388	-20.3225	-21.9319	-21.9319
MEU		-13.1004	-14.705	-15.7433	-16.7735	-17.6208	-18.0263	-18.3517	-18.9707	-19.3072	-19.2119	-20.2235	-20.5112	-20.2235	-21.6098	-21.6098	-20.9167	-20.9167	-20.9167	-20.9167	-21.6098	-21.6098	-21.6098	-21.6098	-21.6098	-21.6098	-21.6098	-21.6098
MFA		-12.5085	-13.2541	-13.8838	-14.4767	-15.0735	-15.7105	-16.2041	-16.6405	-17.0747	-17.5505	-18.2754	-19.3115	-20.3231	-20.6108	-21.7094	-21.7094	-21.7094	-21.7094	-21.7094	-21.7094	-21.7094	-21.7094	-21.7094	-21.7094	-21.7094	-21.7094	-21.7094
MFU		-12.5526	-13.2827	-13.9826	-14.7343	-15.5495	-16.4402	-17.0142	-17.9193	-18.8637	-20.1165	-20.1165	-21.5028	-21.5028	-21.5028	-21.5028	-21.5028	-21.5028	-21.5028	-21.5028	-21.5028	-21.5028	-21.5028	-21.5028	-21.5028	-21.5028	-21.5028	-21.5028
MIM		-13.0301	-13.9689	-14.85	-15.8463	-16.5878	-17.6597	-18.4069	-19.2179	-19.6879	-21.2973	-20.1987	-21.2973	-21.2973	-21.2973	-21.2973	-21.2973	-21.2973	-21.2973	-21.2973	-21.2973	-21.2973	-21.2973	-21.2973	-21.2973	-21.2973	-21.2973	-21.2973
MLU		-12.5001	-13.6493	-14.7112	-15.532	-16.3783	-16.8552	-17.5484	-17.6661	-18.0969	-19.1578	-19.0524	-21.355	-20.6619	-21.355	-21.355	-21.355	-21.355	-21.355	-21.355	-21.355	-21.355	-21.355	-21.355	-21.355	-21.355	-21.355	-21.355
MMS		-12.1427	-12.8263	-13.4811	-14.0534	-14.6754	-15.1179	-15.4669	-15.7295	-15.9061	-16.2053	-16.4572	-16.8817	-17.4148	-17.9163	-18.7331	-19.7316	-20.2912	-20.9844	-21.6775	-20.9844	-20.9844	-21.6775	-21.6775	-21.6775	-21.6775	-21.6775	-21.6775
MMU		-12.4842	-13.2225	-13.8419	-14.5034	-15.0488	-16.0246	-16.9573	-17.6596	-18.0651	-18.7042	-18.7583	-19.1637	-20.55	-20.2623	-20.2623	-19.346	-19.2507	-19.346	-19.5692	-19.8569	-19.346	-19.0837	-19.4514	-19.4514	-19.1637	-19.7027	-19.346
MOC		-12.5017	-13.3445	-14.1192	-14.9243	-15.7307	-16.2281	-16.7961	-17.1306	-17.2467	-17.7322	-17.7835	-17.6369	-18.0889	-19.0232	-19.0232	-20.3224	-20.7279	-20.7279	-20.7279	-21.4211	-21.4211	-21.4211	-21.4211	-21.4211	-21.4211	-21.4211	-21.4211
NLE		-12.6299	-13.3991	-14.0438	-14.8479	-15.6902	-16.4659	-17.2972	-17.7026	-18.5561	-19.0526	-19.389	-20.3053	-20.593	-20.593	-21.6916	-21.6916	-21.6916	-21.6916	-21.6916	-21.6916	-21.6916	-21.6916	-21.6916	-21.6916	-21.6916	-21.6916	-21.6916
OAF		-10.2855	-10.5348	-11.2009	-12.3028	-13.4378	-14.4937	-15.417	-16.1554	-17.2011	-18.1639	-18.4676	-19.3367	-20.803	-21.2085	-21.9016	-21.9016	-21.9016	-20.803	-21.9016	-21.9016	-21.9016	-21.9016	-21.9016	-21.9016	-21.9016	-21.9016	-21.9016
OAN		-13.7105	-15.0405	-16.1238	-16.9635	-18.2985	-19.5025	-19.6848	-20.6011	-21.2943	-21.2943	-21.2943	-21.2943	-21.2943	-21.2943	-21.2943	-21.2943	-21.2943	-21.2943	-21.2943	-21.2943	-21.2943	-21.2943	-21.2943	-21.2943	-21.2943	-21.2943	-21.2943
OAR		-12.487	-13.7836	-14.7808	-15.7505	-16.41	-17.1198	-17.7798	-18.4304	-19.0435	-19.1235	-20.5098	-20.2222	-21.6084	-21.6084	-21.6084	-21.6084	-21.6084	-21.6084	-21.6084	-21.6084	-20.5098	-21.6084	-21.6084	-20.9153	-20.9153	-20.9153	-21.6084
OCU		-13.2326	-13.9949	-14.6938	-15.3491	-15.9485	-16.5574	-17.2694	-18.0012	-18.5943	-19.8471	-20.9457	-20.9457	-21.6388	-21.6388	-21.6388	-21.6388	-21.6388	-21.6388	-21.6388	-21.6388	-21.6388	-21.6388	-21.6388	-21.6388	-21.6388	-21.6388	-21.6388
ODE		-12.856	-13.7967	-14.5688	-15.2114	-15.7402	-16.2176	-16.4534	-16.665	-16.7088	-16.972	-16.9339	-17.4478	-18.0803	-18.8341	-20.2204	-20.5081	-20.9135	-21.6067	-20.9135	-21.6067	-21.6067	-21.6067	-21.6067	-21.6067	-21.6067	-21.6067	-21.6067
OGA		-12.1776	-13.1195	-13.9863	-14.7679	-15.4726	-16.1893	-16.9114	-17.5111	-18.4919	-19.457	-20.8433	-20.8433	-21.5364	-21.5364	-21.5364	-21.5364	-21.5364	-21.5364	-21.5364	-21.5364	-21.5364	-21.5364	-21.5364	-21.5364	-21.5364	-21.5364	-21.5364
OOR		-12.9914	-14.1637	-15.2305	-16.413	-17.3138	-17.8246	-19.0032	-20.3895	-20.1018	-21.4881	-21.4881	-21.4881	-21.4881	-21.4881	-21.4881	-21.4881	-21.4881	-21.4881	-21.4881	-21.4881	-21.4881	-21.4881	-21.4881	-21.4881	-21.4881	-21.4881	-21.4881
OPR		-12.9369	-13.8563	-14.6433	-15.4198	-16.0557	-16.5904	-16.9014	-18.166	-18.2995	-19.5523	-19.9577	-20.6509	-20.6509	-21.344	-21.344	-21.344	-21.344	-21.344	-21.344	-21.344	-21.344	-21.344	-21.344	-21.344	-21.344	-21.344	-21.344
ORO		-12.8781	-13.7591	-14.5047	-15.188	-15.9251	-16.7001	-17.4348	-18.0158	-18.5679	-19.5664	-20.126	-20.4137	-21.5123	-21.5123	-21.5123	-21.5123	-21.5123	-21.5123	-21.5123	-21.5123	-21.5123	-21.5123	-21.5123	-21.5123	-21.5123	-21.5123	-21.5123
PAB		-12.6243	-13.3987	-14.0319	-14.7501	-15.4229	-15.9999	-16.9405	-17.8378	-18.6726	-20.4218	-21.808	-21.1149	-21.808	-21.808	-21.808	-21.808	-21.808	-21.808	-21.808	-21.808	-21.808	-21.808	-21.808	-21.808	-21.808	-21.808	-21.808
PAL		-12.8615	-13.7555	-14.3258	-14.92	-15.4911	-15.8178	-16.3666	-16.9125	-17.2489	-17.4515	-17.976	-18.4529	-19.1461	-20.2447	-21.3433	-20.6501	-21.3433	-21.3433	-21.3433	-21.3433	-21.3433	-21.3433	-21.3433	-21.3433	-21.3433	-21.3433	-20.6501
PAN		-12.558	-13.2448	-13.8532	-14.2358	-14.9317	-15.5504	-16.2395	-16.8809	-17.2299	-17.7154	-18.3068	-19.4382	-21.0476	-21.0476	-21.7408	-21.7408	-21.7408	-21.7408	-21.7408	-21.7408	-21.7408	-21.7408	-21.7408	-21.7408	-21.7408	-21.7408	-21.7408
PCA		-12.1705	-13.4526	-14.9506	-16.3645	-17.4743	-19.0669	-19.9424	-19.9424	-21.5518	-20.8587	-20.8587	-20.4532	-21.5518	-21.5518	-21.5518	-21.5518	-21.5518	-21.5518	-21.5518	-21.5518	-21.5518	-21.5518	-21.5518	-21.5518	-21.5518	-21.5518	-20.8587
PHO		-12.486	-13.9024	-14.9701	-15.8877	-16.6636	-17.4872	-18.6537	-19.6522	-19.8064	-20.2118	-21.5981	-21.5981	-21.5981	-21.5981	-21.5981	-21.5981	-21.5981	-21.5981	-21.5981	-21.5981	-21.5981	-21.5981	-21.5981	-21.5981	-21.5981	-21.5981	-21.5981
PPA		-12.577	-13.3546	-14.0201	-14.6363	-15.1799	-15.809	-16.4237	-17.0272	-17.3117	-17.6381	-17.831	-18.3853	-18.5031	-19.6017	-20.2949	-20.988	-20.988	-21.6812	-21.6812	-21.6812	-21.6812	-21.6812	-21.6812	-21.6812	-21.6812	-21.6812	-21.6812
PTR		-12.5929	-13.3712	-14.0356	-14.606	-15.2518	-15.783	-16.4358	-16.7604	-17.3873	-17.44	-17.7737	-18.0805	-18.3428	-19.1791	-20.6454	-20.6454	-21.744	-21.744	-21.744	-21.744	-21.744	-21.744	-21.744	-21.744	-21.744	-21.744	-21.744
PVA		-12.9036	-13.7669	-14.4493	-15.1098	-15.507	-16.0728	-16.3824	-16.6926	-17.2624	-17.4811	-17.7614	-18.7228	-18.8898	-19.6783	-21.2877	-21.2877	-21.2877	-21.2877	-21.2877	-21.2877	-21.2877	-21.2877	-21.2877	-21.2877	-21.2877	-21.2877	-21.2877
RNO		-12.4827	-13.2287	-13.8706	-14.4694	-14.9496	-15.2314	-15.6402	-15.6352	-15.7055	-15.9833	-16.2011	-16.3799	-16.8595	-17.3042	-18.4436	-19.0567	-20.0122	-21.6217	-21.6217	-21.6217	-21.6217	-21.6217	-21.6217	-21.6217	-21.6217	-21.6217	-21.6217
SAR		-12.7226	-13.6539	-14.3774	-14.985	-15.672	-16.1227	-16.84	-17.4947	-17.6584	-17.9097	-18.4205	-18.5746	-19.2678	-18.9001	-20.3664	-20.7719	-20.7719	-20.7719	-21.465	-21.465	-21.465	-21.465	-21.465	-21.465	-21.465	-21.465	-21.465
SBO		-12.6232	-13.4683	-14.1303	-14.6773	-15.2203	-15.5665	-15.9574	-16.2006	-16.5225	-16.781	-16.7976	-17.7139	-18.1839	-19.6391	-20.8919	-20.8919	-21.5851	-21.5851	-21.5851	-21.5851	-21.5851	-21.5851	-21.5851	-21.5851	-21.5851	-21.5851	-21.5851
SHA		-12.464	-13.4736	-14.2266	-14.9371	-15.5155	-16.0874	-16.7104	-16.9917	-17.7108	-17.862	-18.5758	-18.2573	-18.5758	-19.1148	-19.1889	-20.1444	-19.8079	-20.6552	-21.7538	-21.0607	-21.0607	-21.0607	-21.7538	-21.7538	-21.7538	-21.0607	-21.7538
SSC		-12.2902	-12.6993	-13.3005	-13.9364	-14.5905	-15.3129	-16.0478	-16.718	-17.4264	-18.3427	-18.2686	-19.1159	-19.2982	-19.809	-21.6008	-21.6008	-20.9076	-21.6008	-21.6008	-21.6008	-21.6008	-21.6008	-21.6008	-21.6008	-21.6008	-21.6008	-21.6008
STR		-12.3997	-13.0855	-13.8394	-14.5727	-15.1861	-15.8739	-16.6406	-17.1214	-17.9323	-18.5714	-19.5699	-19.7241	-20.8227	-21.5158	-21.5158	-21.5158	-21.5158	-21.5158	-21.5158	-21.5158	-21.5158	-21.5158	-21.5158	-21.5158	-21.5158	-21.5158	-21.5158
TBE		-12.6907	-13.5744	-14.4207	-15.2408	-16.0749	-16.8895	-17.8484	-18.7326	-19.3744	-20.9838	-20.9838	-21.677	-21.677	-21.677	-21.677	-21.677	-21.677	-21.677	-21.677	-20.9838	-21.677	-21.677	-21.677	-21.677	-21.677	-21.677	-20.9838
TMA		-11.305	-12.6461	-14.2027	-15.7285	-17.0286	-18.0811	-18.984	-19.6126	-20.3058	-20.9989	-20.9989	-20.9989	-21.6921	-21.6921	-21.6921	-21.6921	-21.6921	-21.6921	-21.6921	-21.6921	-21.6921	-21.6921	-21.6921	-21.6921	-21.6921	-21.6921	-21.6921
TSY		-12.6532	-13.5733	-14.4173	-15.2022	-15.9922	-16.7981	-17.7839	-18.1124	-18.8627	-19.2981	-20.5973	-21.0028	-21.696	-21.0028	-21.0028	-21.0028	-21.696	-21.696	-21.696	-21.696	-21.696	-21.696	-21.696	-21.696	-21.696	-21.696	-21.696
TTR		-13.025	-14.1915	-15.3775	-16.4612	-17.3192	-18.3884	-18.9589	-19.5779	-20.4252	-20.8307	-21.5238	-21.5238	-21.5238	-21.5238	-21.5238	-21.5238	-21.5238	-21.5238	-21.5238	-21.5238	-21.5238	-21.5238	-21.5238	-21.5238	-21.5238	-21.5238	-21.5238
VPA		-13.1126	-14.1449	-14.9955	-15.8521	-16.5186	-16.9781	-17.72	-17.7454	-18.0077	-18.4645	-18.7699	-19.011	-19.3295	-19.7995	-19.463	-19.7995	-20.3103	-21.4089	-20.7158	-21.4089	-21.4089	-21.4089	-21.4089	-21.4089	-21.4089	-21.4089	-21.4089
Species		AGG4	AGG5	AGG6	AGG7	AGG8	AGG9	AGG10	AGG11	AGG12	AGG13	AGG14	AGG15	AGG16	AGG17	AGG18	AGG19	AGG20	AGG21	AGG22	AGG23	AGG24	AGG25	AGG26	AGG27	AGG28	AGG29	AGG30
AME		-13.4563	-14.8345	-15.9253	-16.9674	-17.6716	-18.9934	-18.9133	-21.4783	-21.4783	-20.7851	-20.7851	-21.4783	-21.4783	-20.7851	-21.4783	-20.7851	-21.4783	-21.4783	-21.4783	-21.4783	-21.4783	-21.4783	-21.4783	-21.4783	-21.4783	-21.4783	-21.4783
BGR		-13.6294	-15.3587	-16.8095	-17.685	-18.2297	-19.0321	-19.6511	-20.4984	-20.4984	-21.597	-20.9039	-21.597	-21.597	-21.597	-21.597	-21.597	-21.597	-21.597	-21.597	-21.597	-21.597	-21.597	-21.597	-21.597	-21.597	-21.597	-21.597
BTA		-13.6387	-15.2548	-16.543	-17.5277	-18.611	-19.063	-19.7562	-20.0926	-20.3158	-21.0089	-20.6035	-20.3158	-21.0089	-21.7021	-21.7021	-21.7021	-21.7021	-21.0089	-21.0089	-21.7021	-21.7021	-21.7021	-21.7021	-21.7021	-21.7021	-21.7021	-21.7021
CAS		-14.3575	-16.1238	-17.2543	-18.3055	-18.5932	-19.0558	-19.4041	-19.9431	-20.7904	-21.889	-21.889	-21.889	-21.889	-21.889	-21.889	-21.889	-21.889	-21.889	-21.889	-21.889	-21.889	-21.889	-21.889	-21.889	-21.889	-21.889	-21.889
CCR		-13.7052	-15.3766	-16.4902	-17.2204	-17.8949	-18.7928	-19.2448	-19.8044	-20.0921	-20.0921	-20.4976	-21.1907	-21.1907	-21.1907	-21.1907	-21.1907	-21.1907	-21.1907	-21.1907	-21.1907	-21.1907	-21.1907	-21.1907	-21.1907	-21.1907	-21.1907	-21.1907
CFA		-13.3014	-14.482	-15.2869	-15.9878	-16.315	-16.6887	-16.9456	-17.3664	-17.3067	-17.4977	-17.8772	-17.4977	-17.6906	-17.8772	-18.2086	-18.4053	-18.8327	-19.2382	-19.1429	-19.2382	-20.4422	-20.4422	-20.8476	-20.8476	-21.5408	-21.5408	-21.5408
CFE		-13.2816	-14.8802	-16.2024	-17.166	-17.9217	-18.3599	-19.4097	-19.9694	-20.6625	-20.6625	-21.3556	-20.6625	-21.3556	-21.3556	-21.3556	-21.3556	-21.3556	-21.3556	-21.3556	-21.3556	-21.3556	-21.3556	-20.6625	-21.3556	-21.3556	-20.6625	-21.3556
CGR		-13.0739	-14.0779	-14.7698	-15.3241	-15.616	-15.8336	-15.8791	-16.1538	-16.207	-16.2581	-16.6276	-17.336	-17.955	-19.2078	-19.0254	-19.9009	-19.9009	-19.9009	-20.8172	-21.5104	-20.8172	-20.4117	-21.5104	-21.5104	-21.5104	-20.8172	-21.5104
CHI		-13.6356	-15.4944	-16.9036	-17.6154	-18.2184	-19.1008	-19.5063	-19.3885	-20.4871	-20.8926	-21.5857	-21.5857	-20.8926	-21.5857	-21.5857	-21.5857	-21.5857	-21.5857	-21.5857	-21.5857	-21.5857	-21.5857	-21.5857	-21.5857	-21.5857	-21.5857	-21.5857
CHO		-13.9935	-15.235	-16.3549	-17.4281	-18.1403	-18.508	-19.4525	-21.3984	-19.7889	-20.7052	-21.3984	-20.7052	-21.3984	-21.3984	-21.3984	-20.7052	-21.3984	-21.3984	-21.3984	-21.3984	-21.3984	-21.3984	-21.3984	-21.3984	-21.3984	-21.3984	-21.3984
CJA		-13.1395	-14.5126	-15.318	-15.9526	-16.6523	-17.0977	-17.406	-17.9691	-18.217	-18.7383	-18.8495	-19.7368	-19.0437	-18.9747	-19.3801	-19.7368	-19.8909	-20.2964	-20.5841	-20.9896	-21.6827	-20.9896	-21.6827	-21.6827	-21.6827	-20.9896	-21.6827
CLA		-13.0452	-14.2845	-15.2101	-15.9051	-16.5332	-17.0534	-17.4185	-17.4356	-18.5004	-18.6057	-20.3975	-20.3975	-20.3975	-20.3975	-21.4961	-20.3975	-21.4961	-21.4961	-21.4961	-20.8029	-20.8029	-21.4961	-20.8029	-21.4961	-21.4961	-21.4961	-21.4961
CPO		-13.1408	-14.2179	-15.0281	-15.6989	-16.2769	-16.5896	-17.0371	-17.1863	-17.4037	-17.4181	-17.7009	-17.9145	-17.6268	-18.2182	-18.3941	-18.4333	-18.9441	-18.5167	-19.1673	-19.3496	-20.2659	-20.0427	-20.2659	-20.959	-20.5536	-21.6522	-21.6522
CSI		-13.3107	-14.7767	-15.8591	-16.888	-17.7038	-18.2002	-18.9675	-19.453	-20.1461	-20.8393	-21.5324	-21.5324	-21.5324	-21.5324	-21.5324	-21.5324	-21.5324	-21.5324	-21.5324	-21.5324	-21.5324	-21.5324	-21.5324	-21.5324	-21.5324	-21.5324	-21.5324
DNO		-13.6522	-15.2975	-16.367	-17.3103	-18.0141	-18.6862	-19.667	-20.0725	-20.2548	-20.4779	-21.1711	-20.7656	-20.7656	-21.8642	-20.7656	-21.8642	-21.1711	-21.8642	-21.8642	-21.8642	-21.8642	-21.8642	-21.8642	-21.1711	-21.8642	-21.8642	-21.8642
DOR		-12.5962	-13.4054	-14.0112	-14.6405	-15.3029	-15.8998	-16.4968	-17.0648	-17.2068	-17.6734	-17.8503	-18.4511	-18.3399	-18.5762	-19.0871	-19.4925	-19.4925	-20.1857	-19.898	-20.1857	-20.5911	-20.1857	-20.5911	-20.5911	-21.2843	-21.2843	-21.2843
ECA		-13.4027	-14.9838	-16.0769	-16.857	-17.9466	-18.4665	-19.2549	-19.9481	-20.4589	-19.9481	-20.1712	-20.8644	-20.8644	-21.5575	-21.5575	-21.5575	-21.5575	-21.5575	-21.5575	-21.5575	-21.5575	-21.5575	-20.8644	-21.5575	-21.5575	-21.5575	-21.5575
EED		-13.7772	-14.8906	-15.7601	-16.4466	-17.0758	-17.5409	-17.6669	-18.6135	-19.569	-19.6744	-21.1784	-20.2621	-20.4853	-21.8716	-21.8716	-21.8716	-21.1784	-21.8716	-21.1784	-21.8716	-21.8716	-21.8716	-21.8716	-21.8716	-21.8716	-21.8716	-21.8716
EEU		-12.1174	-12.9698	-13.6814	-14.2485	-14.6571	-14.9592	-15.1884	-15.551	-15.9088	-16.6093	-17.2379	-17.9037	-18.3791	-18.8065	-19.4351	-19.1167	-19.9052	-20.1283	-20.416	-20.1283	-20.416	-20.8214	-21.5146	-20.416	-20.8214	-21.5146	-21.5146
EFU		-13.1083	-14.2006	-14.9987	-15.5432	-15.9131	-16.2168	-16.6352	-16.7276	-17.3684	-17.8929	-18.3698	-18.8623	-18.9576	-19.3143	-19.8739	-19.8739	-19.8739	-21.2602	-21.2602	-21.2602	-21.2602	-21.2602	-21.2602	-20.5671	-21.2602	-21.2602	-21.2602
ETE		-13.3757	-14.5307	-15.3825	-16.0814	-16.714	-17.0417	-17.7765	-18.2593	-18.2593	-19.1417	-19.1417	-20.9335	-21.6266	-20.528	-21.6266	-20.9335	-20.528	-21.6266	-20.9335	-20.528	-21.6266	-20.9335	-21.6266	-21.6266	-20.9335	-21.6266	-21.6266
FCA		-13.3639	-14.5284	-15.333	-15.9518	-16.4881	-16.813	-17.241	-17.3268	-17.2688	-17.6813	-17.5802	-17.8939	-18.2357	-19.0466	-18.8924	-19.1336	-20.8383	-20.8383	-21.5315	-20.8383	-21.5315	-21.5315	-21.5315	-21.5315	-21.5315	-21.5315	-21.5315
GGO		-13.3094	-14.759	-15.7437	-16.545	-17.4194	-18.2441	-19.3119	-20.3235	-21.0167	-21.0167	-19.9181	-21.7098	-21.7098	-21.7098	-21.0167	-21.0167	-21.7098	-21.7098	-21.7098	-21.7098	-21.7098	-21.7098	-21.7098	-21.7098	-21.7098	-21.7098	-21.7098
HGL		-13.0949	-14.2058	-15.0113	-15.6015	-16.0373	-16.2469	-16.6974	-16.7647	-17.3507	-17.9543	-18.6192	-19.7179	-19.207	-19.5637	-20.8165	-19.5637	-20.8165	-20.8165	-20.411	-20.411	-20.8165	-20.8165	-21.5096	-21.5096	-21.5096	-21.5096	-21.5096
HSA		-13.148	-14.5736	-15.5294	-16.4428	-17.2208	-17.6743	-18.3512	-18.6071	-19.0771	-19.7057	-19.7057	-20.1757	-20.3989	-20.3989	-20.6865	-21.092	-21.092	-21.092	-21.7851	-21.092	-21.7851	-21.7851	-21.092	-21.7851	-21.7851	-21.7851	-21.7851
JJA		-13.1523	-14.2436	-15.1498	-15.8348	-16.4415	-16.7756	-17.7002	-18.2756	-19.2688	-19.7796	-19.962	-20.4728	-20.4728	-20.8783	-20.8783	-20.8783	-20.8783	-21.5714	-21.5714	-21.5714	-20.8783	-21.5714	-21.5714	-21.5714	-21.5714	-21.5714	-21.5714
LAF		-13.9874	-15.5781	-16.8458	-18.002	-18.6731	-20.0169	-21.1155	-20.4223	-20.4223	-21.1155	-21.8086	-21.8086	-21.1155	-21.8086	-21.1155	-21.8086	-21.8086	-21.8086	-20.71	-21.8086	-21.8086	-21.8086	-21.8086	-21.8086	-21.8086	-21.1155	-21.8086
LWE		-13.3392	-14.6002	-15.6421	-16.5853	-17.3906	-17.8846	-18.7601	-19.0702	-20.0818	-20.3695	-20.3695	-21.4681	-21.4681	-21.4681	-20.775	-21.4681	-21.4681	-21.4681	-21.4681	-21.4681	-21.4681	-21.4681	-21.4681	-21.4681	-21.4681	-21.4681	-21.4681
MAU		-12.9646	-13.949	-14.6456	-15.3168	-15.606	-16.0809	-16.2691	-16.5162	-17.0423	-17.4672	-18.0668	-18.3545	-18.6265	-19.7896	-19.7896	-19.3196	-19.6073	-20.0128	-20.3004	-20.7059	-20.0128	-20.7059	-20.7059	-20.3004	-21.399	-20.3004	-21.399
MBR		-13.1029	-14.1627	-14.911	-15.3236	-15.6218	-15.9953	-16.4393	-16.9575	-17.741	-18.3562	-18.7129	-19.0493	-20.6588	-20.6588	-21.3519	-20.2533	-21.3519	-21.3519	-21.3519	-21.3519	-21.3519	-21.3519	-21.3519	-20.2533	-21.3519	-21.3519	-21.3519
MDA		-13.1547	-14.2244	-15.0323	-15.4865	-15.8466	-16.2607	-16.544	-17.0781	-17.8011	-18.2066	-19.9113	-20.6045	-20.6045	-21.2976	-20.6045	-21.2976	-20.6045	-21.2976	-20.6045	-21.2976	-20.6045	-21.2976	-21.2976	-20.6045	-21.2976	-21.2976	-21.2976
MDO		-13.2268	-14.2277	-14.995	-15.5991	-16.1064	-16.7361	-17.0952	-17.3696	-17.675	-18.1168	-18.1393	-18.5913	-18.4895	-18.7046	-19.1509	-19.0331	-19.2154	-19.8441	-20.3141	-19.9776	-19.7263	-20.3141	-19.1509	-20.8249	-20.5372	-20.1317	-19.7263
MEU		-13.1259	-14.2865	-15.1327	-15.89	-16.7406	-17.0361	-17.5229	-17.6686	-18.3815	-18.4223	-18.7672	-19.2978	-19.0355	-19.6545	-19.1155	-19.6545	-20.5018	-20.5018	-21.6004	-20.9073	-20.9073	-21.6004	-21.6004	-20.5018	-21.6004	-21.6004	-21.6004
MFA		-13.1703	-14.4631	-15.318	-15.9553	-16.5717	-17.0011	-17.4674	-17.9404	-18.038	-18.657	-18.5235	-18.7058	-19.1366	-19.1366	-19.6221	-20.3153	-20.6029	-21.7016	-21.7016	-21.0084	-21.7016	-21.0084	-21.0084	-21.7016	-21.7016	-21.7016	-21.7016
MFU		-13.2824	-14.5156	-15.3783	-16.2825	-16.9594	-17.3811	-17.9656	-18.3565	-18.4009	-18.4962	-19.8825	-19.8825	-21.492	-21.492	-21.492	-21.492	-21.492	-20.7988	-21.492	-21.492	-21.492	-21.492	-21.492	-21.492	-21.492	-21.492	-21.492
MIM		-13.1955	-14.5164	-15.3391	-15.88	-16.3745	-17.1283	-17.526	-18.0683	-18.2914	-18.9846	-19.4954	-18.9846	-19.9009	-19.9009	-19.9009	-20.594	-19.9009	-20.594	-20.594	-20.594	-21.2872	-20.594	-21.2872	-20.1886	-20.594	-20.594	-20.1886
MLU		-13.1714	-14.2554	-14.9886	-15.517	-15.8707	-16.306	-16.491	-16.7786	-16.9122	-16.7378	-16.6702	-16.6068	-16.5981	-17.0525	-17.3917	-17.6794	-18.1649	-18.1241	-18.4526	-18.8581	-18.8581	-19.3971	-19.5512	-19.7336	-21.343	-20.6498	-21.343
MMS		-12.3303	-13.1643	-13.8262	-14.3968	-14.843	-15.0659	-15.3477	-15.4659	-15.5977	-15.6946	-15.7283	-15.7658	-15.7796	-16.0301	-16.0195	-16.1631	-16.4644	-16.5505	-16.8482	-17.0533	-17.299	-17.608	-17.7564	-18.0849	-18.3012	-18.4904	-18.9604
MMU		-13.1544	-14.5556	-15.4463	-16.1353	-16.6234	-17.4818	-18.0031	-18.4626	-19.1558	-19.3381	-19.6948	-21.6407	-20.9475	-20.9475	-20.9475	-20.2544	-21.6407	-20.2544	-20.5421	-20.2544	-20.2544	-20.5421	-20.5421	-20.5421	-20.5421	-21.6407	-20.9475
MOC		-13.0736	-14.2407	-15.0738	-15.5318	-15.6694	-15.8029	-16.0052	-16.2194	-16.7119	-17.0686	-17.8289	-18.2769	-18.5792	-18.9275	-19.0145	-19.6206	-19.3329	-19.6206	-19.8029	-20.3138	-19.8029	-20.0261	-19.8029	-20.0261	-20.0261	-21.4124	-21.4124
NLE		-13.3004	-14.6908	-15.6233	-16.3815	-17.2188	-17.7145	-18.6402	-19.3822	-19.1198	-19.3822	-19.7388	-20.0753	-19.893	-20.9916	-20.5861	-20.5861	-20.9916	-20.9916	-21.6848	-20.9916	-21.6848	-21.6848	-21.6848	-21.6848	-21.6848	-21.6848	-21.6848
OAF		-13.7843	-15.2855	-16.3642	-17.2194	-18.0949	-18.238	-19.4167	-19.2625	-20.1098	-21.2084	-21.2084	-21.9016	-21.9016	-21.9016	-20.803	-21.9016	-21.9016	-21.9016	-21.9016	-21.9016	-21.9016	-21.9016	-21.9016	-21.9016	-21.9016	-21.9016	-21.9016
OAN		-12.1648	-13.3579	-14.3041	-15.235	-15.9497	-16.6526	-17.1667	-17.9818	-18.4444	-19.8913	-19.4858	-19.3317	-20.5845	-19.8913	-20.5845	-20.179	-21.2776	-20.5845	-20.5845	-21.2776	-20.5845	-21.2776	-21.2776	-21.2776	-21.2776	-20.5845	-21.2776
OAR		-13.64	-15.4844	-16.6516	-17.9628	-18.233	-19.2978	-19.9909	-20.5017	-20.5017	-20.214	-20.9072	-21.6003	-21.6003	-20.9072	-21.6003	-21.6003	-21.6003	-21.6003	-21.6003	-21.6003	-21.6003	-21.6003	-21.6003	-21.6003	-21.6003	-21.6003	-21.6003
OCU		-13.2688	-14.4189	-15.2786	-16.0887	-16.7357	-17.1952	-17.7548	-18.0425	-18.2248	-18.2587	-18.535	-18.7356	-18.987	-19.4288	-19.4288	-20.2397	-20.2397	-20.5274	-21.626	-20.9329	-20.2397	-20.9329	-21.626	-21.626	-20.9329	-21.626	-21.626
ODE		-12.8192	-13.7133	-14.4441	-15.0524	-15.3197	-15.5537	-15.9026	-16.1453	-16.5212	-17.053	-17.8587	-18.1624	-18.5053	-19.1114	-19.2938	-19.1984	-19.9869	-19.5169	-20.9032	-20.9032	-20.21	-21.5963	-20.9032	-20.4977	-20.9032	-20.9032	-21.5963
OGA		-13.4168	-14.9564	-16.1473	-17.0846	-18.0009	-18.4362	-19.0423	-20.1409	-20.4286	-20.1409	-21.5272	-21.5272	-21.5272	-21.5272	-21.5272	-21.5272	-21.5272	-21.5272	-21.5272	-21.5272	-21.5272	-21.5272	-21.5272	-21.5272	-21.5272	-21.5272	-21.5272
OOR		-13.8398	-15.4924	-16.4774	-17.5111	-18.1492	-18.2233	-19.2841	-19.4019	-20.3828	-19.8719	-21.4814	-21.4814	-20.7882	-21.4814	-21.4814	-21.4814	-20.7882	-21.4814	-21.4814	-21.4814	-21.4814	-21.4814	-21.4814	-21.4814	-21.4814	-21.4814	-21.4814
OPR		-13.3254	-14.7161	-15.6987	-16.6606	-17.4417	-17.8995	-18.6254	-18.7685	-19.9472	-19.9472	-21.3335	-21.3335	-21.3335	-21.3335	-21.3335	-21.3335	-21.3335	-21.3335	-21.3335	-21.3335	-21.3335	-21.3335	-21.3335	-21.3335	-21.3335	-21.3335	-21.3335
ORO		-13.5043	-14.8903	-15.9571	-16.6348	-17.6522	-17.8647	-18.4113	-18.2442	-18.9374	-19.5564	-20.4037	-19.8929	-21.5023	-21.5023	-20.8092	-21.5023	-21.5023	-21.5023	-21.5023	-21.5023	-21.5023	-21.5023	-21.5023	-21.5023	-21.5023	-21.5023	-21.5023
PAB		-13.2963	-14.6759	-15.7068	-16.6705	-17.3006	-18.1628	-18.6223	-19.4025	-19.4978	-20.7018	-20.191	-21.8004	-21.8004	-20.7018	-21.1072	-21.8004	-21.8004	-21.8004	-21.8004	-21.8004	-21.8004	-21.8004	-21.8004	-21.1072	-21.8004	-21.8004	-21.8004
PAL		-13.5196	-14.7982	-15.5709	-16.264	-16.5029	-17.0625	-17.578	-18.0434	-18.506	-19.9529	-20.2406	-21.3392	-21.3392	-20.6461	-21.3392	-21.3392	-21.3392	-20.6461	-21.3392	-21.3392	-21.3392	-21.3392	-21.3392	-21.3392	-21.3392	-21.3392	-21.3392
PAN		-13.2172	-14.5163	-15.4015	-16.1236	-16.6271	-17.3763	-17.5434	-17.9954	-18.299	-18.5142	-19.025	-19.025	-19.2481	-19.5358	-19.6536	-20.3467	-20.6344	-21.0399	-21.733	-20.6344	-21.0399	-21.733	-21.0399	-21.733	-21.733	-21.0399	-21.733
PCA		-14.1927	-15.7782	-16.8254	-17.7026	-18.9137	-19.3556	-20.1665	-19.9433	-20.4542	-21.5528	-20.8596	-21.5528	-21.5528	-21.5528	-21.5528	-21.5528	-21.5528	-21.5528	-21.5528	-21.5528	-21.5528	-21.5528	-21.5528	-21.5528	-21.5528	-21.5528	-21.5528
PHO		-13.6699	-15.4436	-16.8538	-17.7833	-18.2577	-18.9509	-20.2037	-19.7982	-20.8968	-20.2037	-21.59	-20.8968	-21.59	-21.59	-21.59	-21.59	-21.59	-21.59	-21.59	-21.59	-21.59	-21.59	-21.59	-21.59	-21.59	-21.59	-21.59
PPA		-13.2346	-14.6196	-15.5841	-16.5141	-17.2787	-18.1178	-18.3773	-19.7273	-19.3706	-19.7273	-20.2869	-19.8814	-20.98	-20.2869	-21.6732	-21.6732	-20.98	-21.6732	-20.5746	-20.98	-20.98	-20.5746	-20.98	-21.6732	-21.6732	-21.6732	-21.6732
PTR		-13.2659	-14.6403	-15.7298	-16.6242	-17.7472	-18.404	-19.1712	-19.5389	-20.6376	-19.7903	-20.6376	-21.043	-21.7362	-21.7362	-20.3499	-21.043	-21.043	-21.043	-21.7362	-21.043	-21.7362	-21.7362	-21.7362	-21.7362	-21.7362	-21.7362	-21.7362
PVA		-13.5478	-14.8312	-15.5929	-16.2928	-16.8765	-17.3914	-18.0644	-18.1922	-18.9807	-18.7183	-18.8853	-19.3373	-18.7183	-18.9807	-19.086	-19.6738	-19.6738	-20.5901	-21.2832	-21.2832	-21.2832	-21.2832	-21.2832	-20.5901	-21.2832	-21.2832	-21.2832
RNO		-12.4036	-13.3083	-14.1217	-14.8541	-15.3199	-15.6944	-15.9643	-16.184	-16.5507	-16.7155	-16.8597	-16.9883	-17.3506	-17.5024	-17.8067	-18.058	-18.3944	-18.3944	-19.0484	-19.0484	-19.5339	-19.6674	-20.9202	-20.5147	-20.5147	-20.9202	-20.5147
SAR		-12.8276	-13.6819	-14.2858	-14.88	-15.2772	-15.638	-16.0524	-16.3312	-16.5953	-17.0484	-17.4661	-18.6825	-18.8902	-20.762	-20.0688	-20.0688	-20.762	-20.3565	-20.3565	-20.0688	-20.3565	-20.0688	-20.762	-20.762	-20.3565	-21.4551	-21.4551
SBO		-13.1133	-14.5077	-15.3831	-15.9754	-16.6147	-17.0342	-17.2871	-18.0222	-18.0222	-18.3194	-19.0926	-18.8695	-19.9681	-20.4789	-21.5775	-20.8844	-21.5775	-21.5775	-21.5775	-21.5775	-21.5775	-21.5775	-21.5775	-21.5775	-21.5775	-21.5775	-21.5775
SHA		-12.8832	-13.8797	-14.5863	-15.2733	-15.7729	-16.3094	-16.7083	-16.9811	-17.2974	-18.0882	-18.4559	-18.9792	-20.1423	-20.3655	-21.0586	-21.7518	-21.7518	-20.6532	-21.7518	-21.7518	-21.7518	-21.7518	-21.7518	-21.7518	-21.7518	-21.7518	-21.7518
SSC		-13.501	-14.942	-16.0252	-17.1991	-17.956	-18.9545	-19.291	-19.5141	-20.9004	-20.9004	-20.2073	-20.4949	-20.9004	-20.9004	-21.5936	-21.5936	-21.5936	-20.9004	-21.5936	-20.9004	-21.5936	-21.5936	-21.5936	-21.5936	-21.5936	-21.5936	-21.5936
STR		-13.0447	-14.0789	-14.7348	-15.3196	-15.676	-15.9206	-16.3899	-16.7543	-16.9027	-17.3335	-17.7012	-18.3724	-19.4284	-18.9429	-19.7161	-20.1216	-19.8984	-20.8147	-19.8984	-20.1216	-20.4092	-20.8147	-20.4092	-21.5078	-21.5078	-20.8147	-21.5078
TBE		-13.3343	-14.9151	-16.0195	-16.6315	-17.0938	-17.4058	-17.6795	-18.4496	-18.0576	-18.7781	-18.9604	-19.4713	-21.6685	-20.0591	-20.9753	-21.6685	-21.6685	-21.6685	-21.6685	-21.6685	-21.6685	-21.6685	-21.6685	-21.6685	-21.6685	-21.6685	-21.6685
TMA		-13.6619	-15.2753	-16.3625	-17.4857	-18.5549	-18.9823	-19.2055	-19.7445	-20.5918	-21.6904	-21.6904	-21.6904	-21.6904	-21.6904	-21.6904	-21.6904	-21.6904	-21.6904	-21.6904	-21.6904	-21.6904	-21.6904	-21.6904	-21.6904	-21.6904	-21.6904	-21.6904
TSY		-13.8268	-15.0254	-15.9178	-16.3841	-17.0674	-17.685	-18.137	-18.7479	-18.7479	-19.2075	-18.8592	-19.7465	-20.5938	-20.9992	-20.3061	-21.6924	-21.6924	-21.6924	-21.6924	-21.6924	-21.6924	-21.6924	-21.6924	-21.6924	-21.6924	-21.6924	-21.6924
TTR		-13.8381	-15.4843	-16.5269	-17.3277	-18.2593	-18.2985	-18.3819	-18.2985	-19.0324	-20.1311	-20.1311	-20.4187	-20.8242	-20.1311	-20.8242	-21.5174	-20.4187	-21.5174	-21.5174	-20.8242	-21.5174	-21.5174	-21.5174	-21.5174	-21.5174	-21.5174	-21.5174
VPA		-13.2105	-14.6344	-16.0035	-16.6568	-17.8464	-18.0695	-18.5113	-19.3223	-20.7086	-19.7923	-19.61	-20.7086	-20.7086	-20.3031	-20.7086	-21.4017	-21.4017	-21.4017	-21.4017	-21.4017	-21.4017	-21.4017	-21.4017	-21.4017	-21.4017	-20.7086	-21.4017
		CG4	CG5	CG6	CG7	CG8	CG9	CG10	CG11	CG12	CG13	CG14	CG15	CG16	CG17	CG18	CG19	CG20	CG21	CG22	CG23	CG24	CG25	CG26	CG27	CG28	CG29	CG30
		-13.1261	-14.553	-15.6405	-16.3448	-17.1013	-17.748	-18.2363	-18.6989	-19.4527	-19.9227	-20.4335	-21.5321	-21.5321	-21.5321	-21.5321	-21.5321	-21.5321	-21.5321	-21.5321	-21.5321	-21.5321	-21.5321	-21.5321	-21.5321	-21.5321	-21.5321	-21.5321
		-13.6986	-14.9765	-16.0968	-16.7298	-17.3871	-18.3176	-19.3472	-19.5703	-20.5512	-20.2635	-21.6498	-21.6498	-21.6498	-21.6498	-20.9566	-21.6498	-21.6498	-21.6498	-21.6498	-21.6498	-21.6498	-21.6498	-21.6498	-21.6498	-21.6498	-21.6498	-21.6498
		-13.3999	-14.8538	-15.8768	-16.5235	-17.2113	-17.7292	-18.4965	-19.1896	-21.0614	-20.656	-20.656	-21.7546	-20.656	-21.7546	-21.7546	-21.7546	-21.7546	-21.7546	-21.7546	-21.7546	-21.7546	-21.7546	-21.7546	-21.7546	-21.7546	-21.7546	-21.7546
		-14.3742	-15.9081	-17.1242	-17.5056	-18.4707	-19.1638	-19.5385	-19.9905	-21.2432	-21.2432	-21.9364	-21.9364	-21.9364	-21.9364	-21.9364	-21.9364	-21.9364	-21.9364	-21.9364	-21.9364	-21.9364	-21.9364	-21.9364	-21.9364	-21.9364	-21.9364	-21.9364
		-13.1174	-14.8269	-15.7755	-16.6384	-17.6883	-18.0247	-18.5356	-18.7587	-19.6342	-19.8573	-19.6342	-21.2436	-21.2436	-21.2436	-21.2436	-21.2436	-21.2436	-21.2436	-21.2436	-21.2436	-21.2436	-21.2436	-21.2436	-21.2436	-21.2436	-21.2436	-21.2436
		-13.0725	-14.6018	-15.7096	-16.5395	-17.4686	-18.0693	-18.8876	-19.9863	-19.8039	-20.4971	-20.9026	-20.4971	-21.5957	-21.5957	-21.5957	-21.5957	-21.5957	-21.5957	-21.5957	-21.5957	-21.5957	-21.5957	-21.5957	-21.5957	-21.5957	-21.5957	-21.5957
		-13.4323	-14.6687	-15.4253	-16.1997	-16.7941	-17.7203	-18.7012	-19.6175	-21.4092	-20.3106	-21.4092	-21.4092	-20.7161	-21.4092	-21.4092	-21.4092	-21.4092	-21.4092	-21.4092	-21.4092	-21.4092	-21.4092	-21.4092	-21.4092	-21.4092	-21.4092	-21.4092
		-13.0521	-13.6713	-14.1846	-14.5848	-15.0399	-15.277	-15.7749	-16.1443	-16.5086	-17.0005	-17.7582	-18.5204	-18.8568	-20.1786	-20.8717	-20.1786	-21.5649	-20.8717	-21.5649	-21.5649	-21.5649	-20.8717	-21.5649	-21.5649	-20.8717	-20.8717	-21.5649
		-13.7979	-15.0483	-15.7922	-16.576	-17.2819	-18.1123	-18.8054	-19.8469	-21.6386	-21.6386	-20.9455	-21.6386	-21.6386	-21.6386	-21.6386	-21.6386	-21.6386	-21.6386	-21.6386	-21.6386	-21.6386	-21.6386	-21.6386	-21.6386	-21.6386	-21.6386	-21.6386
		-14.2204	-15.2918	-16.3529	-17.3691	-18.0454	-17.8357	-19.3672	-19.6549	-20.7535	-21.4466	-20.7535	-21.4466	-21.4466	-21.4466	-21.4466	-21.4466	-21.4466	-21.4466	-21.4466	-21.4466	-21.4466	-21.4466	-21.4466	-21.4466	-21.4466	-21.4466	-21.4466
		-13.4232	-14.7129	-15.6884	-16.3467	-16.94	-18.0222	-18.5577	-19.7899	-20.1264	-20.6372	-21.7358	-21.7358	-21.7358	-21.7358	-21.7358	-21.7358	-21.7358	-21.7358	-21.7358	-21.7358	-21.7358	-21.7358	-21.7358	-21.7358	-21.7358	-21.7358	-21.7358
		-13.1737	-14.5545	-15.3945	-16.1467	-16.905	-17.2055	-17.8117	-18.2171	-18.7161	-19.9399	-19.6034	-20.4507	-21.5493	-21.5493	-21.5493	-21.5493	-21.5493	-21.5493	-21.5493	-21.5493	-21.5493	-21.5493	-21.5493	-21.5493	-21.5493	-21.5493	-21.5493
		-13.3817	-14.8163	-15.6746	-16.5211	-17.1703	-18.0393	-18.6583	-19.757	-19.4003	-20.0934	-21.0097	-20.3166	-21.7029	-21.7029	-21.7029	-21.7029	-21.7029	-21.7029	-21.7029	-21.7029	-21.7029	-21.7029	-21.7029	-21.7029	-21.7029	-21.7029	-21.7029
		-13.1012	-14.7106	-15.8072	-16.3591	-16.9999	-18.0013	-18.7516	-19.5054	-19.7931	-20.1985	-20.8917	-20.8917	-21.5848	-21.5848	-21.5848	-21.5848	-21.5848	-21.5848	-21.5848	-21.5848	-21.5848	-21.5848	-21.5848	-21.5848	-21.5848	-21.5848	-21.5848
		-13.2029	-15.0628	-16.5465	-17.3954	-18.4514	-19.084	-20.3077	-21.9172	-21.9172	-21.9172	-21.9172	-21.224	-21.9172	-21.9172	-21.9172	-21.9172	-21.9172	-21.9172	-21.9172	-21.9172	-21.9172	-21.9172	-21.9172	-21.9172	-21.9172	-21.9172	-21.9172
		-12.5805	-13.5577	-14.3577	-15.0764	-15.8026	-16.23	-16.9292	-17.5073	-18.3915	-18.4456	-20.2373	-19.9497	-20.6428	-20.6428	-21.336	-21.336	-21.336	-21.336	-21.336	-21.336	-21.336	-21.336	-21.336	-21.336	-21.336	-21.336	-21.336
		-13.579	-15.1778	-16.2877	-17.0568	-18.0272	-18.4326	-19.8189	-20.5121	-20.2244	-21.6107	-20.5121	-21.6107	-21.6107	-21.6107	-21.6107	-21.6107	-21.6107	-21.6107	-21.6107	-21.6107	-21.6107	-21.6107	-21.6107	-21.6107	-21.6107	-21.6107	-21.6107
		-13.4528	-14.3905	-15.0447	-15.6625	-16.1569	-16.8531	-17.5526	-18.3385	-19.3571	-20.1303	-21.2289	-20.8234	-21.922	-21.922	-21.922	-21.922	-21.922	-21.922	-21.922	-21.922	-21.922	-21.922	-21.922	-21.922	-21.922	-21.922	-21.922
		-13.3905	-14.4606	-15.2734	-15.911	-16.5079	-17.0062	-17.8569	-18.2383	-18.6801	-19.1726	-19.2679	-20.8774	-20.8774	-21.5705	-21.5705	-21.5705	-21.5705	-21.5705	-21.5705	-21.5705	-21.5705	-21.5705	-21.5705	-21.5705	-21.5705	-21.5705	-21.5705
		-12.8976	-14.0753	-14.8797	-15.3825	-15.9284	-16.6261	-16.9354	-17.5332	-18.373	-19.1202	-19.238	-20.2188	-21.3174	-21.3174	-21.3174	-21.3174	-21.3174	-21.3174	-21.3174	-21.3174	-21.3174	-21.3174	-21.3174	-21.3174	-21.3174	-21.3174	-21.3174
		-13.2772	-14.315	-15.0687	-15.6769	-16.2043	-16.8287	-17.3903	-17.8966	-18.5453	-19.7349	-20.2945	-20.5822	-21.6808	-20.5822	-20.9876	-21.6808	-21.6808	-21.6808	-21.6808	-21.6808	-21.6808	-21.6808	-21.6808	-21.6808	-21.6808	-21.6808	-21.6808
		-12.9275	-13.9017	-14.5953	-15.309	-15.9313	-16.4305	-16.9588	-17.5407	-17.8225	-18.0574	-18.8757	-18.8112	-19.792	-20.1975	-20.1975	-20.4851	-21.5837	-21.5837	-21.5837	-21.5837	-21.5837	-21.5837	-21.5837	-21.5837	-21.5837	-21.5837	-21.5837
		-13.6685	-15.2374	-16.2972	-17.0789	-17.7907	-18.5029	-19.5638	-20.3747	-20.6624	-21.761	-21.761	-21.761	-21.761	-21.761	-21.761	-21.761	-21.761	-21.761	-21.761	-21.761	-21.761	-21.761	-21.761	-21.761	-21.761	-21.761	-21.761
		-13.1316	-14.4659	-15.3951	-16.0532	-16.8176	-17.3882	-17.925	-18.3437	-18.6181	-19.7708	-20.8694	-21.5626	-21.5626	-21.5626	-21.5626	-21.5626	-21.5626	-21.5626	-21.5626	-21.5626	-21.5626	-21.5626	-21.5626	-21.5626	-21.5626	-21.5626	-21.5626
		-13.4823	-14.9849	-15.8901	-16.5006	-16.9784	-17.9262	-18.7027	-19.1301	-19.641	-20.7396	-21.8382	-21.8382	-21.8382	-21.8382	-21.8382	-21.8382	-21.8382	-21.8382	-21.8382	-21.8382	-21.8382	-21.8382	-21.8382	-21.8382	-21.8382	-21.8382	-21.8382
		-12.9874	-14.065	-14.811	-15.3473	-16.067	-16.6648	-17.4688	-18.1937	-18.2955	-19.6818	-20.2414	-20.9345	-20.5291	-21.6277	-21.6277	-21.6277	-21.6277	-21.6277	-21.6277	-21.6277	-21.6277	-21.6277	-21.6277	-21.6277	-21.6277	-21.6277	-21.6277
		-13.8048	-15.2898	-16.2734	-16.8368	-17.4912	-18.5648	-19.2957	-19.9147	-20.0689	-21.8606	-21.8606	-21.8606	-21.8606	-21.8606	-21.8606	-21.8606	-21.8606	-21.8606	-21.8606	-21.8606	-21.8606	-21.8606	-21.8606	-21.8606	-21.8606	-21.8606	-21.8606
		-13.0827	-14.5339	-15.5822	-16.302	-16.8974	-17.497	-17.967	-18.632	-19.3251	-19.4429	-20.8292	-21.5223	-21.5223	-21.5223	-21.5223	-21.5223	-21.5223	-21.5223	-21.5223	-21.5223	-21.5223	-21.5223	-21.5223	-21.5223	-21.5223	-21.5223	-21.5223
		-12.7555	-13.5442	-14.183	-14.7973	-15.2761	-15.7842	-16.1022	-16.5562	-17.15	-17.6039	-18.1582	-18.9691	-20.3554	-21.4541	-19.8446	-20.7609	-21.4541	-21.4541	-21.4541	-21.4541	-21.4541	-21.4541	-21.4541	-21.4541	-21.4541	-21.4541	-21.4541
		-13.4023	-14.4626	-15.1821	-15.8214	-16.3652	-16.9313	-17.7451	-18.1128	-19.3292	-19.7992	-20.31	-20.7155	-20.31	-21.4086	-21.4086	-21.4086	-21.4086	-21.4086	-21.4086	-21.4086	-21.4086	-21.4086	-21.4086	-21.4086	-21.4086	-21.4086	-21.4086
		-13.2087	-14.1519	-15.0836	-15.771	-16.645	-17.1957	-17.6657	-18.31	-19.5628	-19.5628	-19.7451	-20.6614	-21.3545	-21.3545	-21.3545	-21.3545	-21.3545	-21.3545	-21.3545	-21.3545	-21.3545	-21.3545	-21.3545	-21.3545	-21.3545	-21.3545	-21.3545
		-14.4826	-15.4263	-16.2458	-16.9325	-17.7712	-18.365	-18.6437	-19.578	-20.5896	-20.8773	-21.2828	-21.9759	-21.9759	-21.9759	-21.9759	-21.9759	-21.9759	-21.9759	-21.9759	-21.9759	-21.9759	-21.9759	-21.9759	-21.9759	-21.9759	-21.9759	-21.9759
		-14.2564	-15.2892	-16.1446	-16.8582	-17.3365	-18.5185	-19.1691	-19.2561	-19.8622	-20.5554	-21.654	-20.5554	-20.9608	-21.654	-20.9608	-20.9608	-21.654	-21.654	-21.654	-21.654	-21.654	-21.654	-21.654	-21.654	-21.654	-21.654	-21.654
		-13.4774	-14.8668	-15.6698	-16.456	-17.3723	-18.2578	-18.8099	-19.8084	-20.6557	-21.0612	-21.7543	-21.7543	-21.7543	-21.7543	-21.7543	-21.7543	-21.7543	-21.7543	-21.7543	-21.7543	-21.7543	-21.7543	-21.7543	-21.7543	-21.7543	-21.7543	-21.7543
		-12.9849	-14.3313	-15.1974	-15.963	-16.6339	-17.6547	-18.2143	-18.8385	-19.3493	-19.7548	-20.8534	-21.5465	-21.5465	-21.5465	-21.5465	-21.5465	-21.5465	-21.5465	-21.5465	-21.5465	-21.5465	-21.5465	-21.5465	-21.5465	-21.5465	-21.5465	-21.5465
		-13.1872	-14.7023	-16.0375	-16.9714	-17.9068	-18.7759	-18.8559	-19.9545	-21.3408	-21.3408	-21.3408	-21.3408	-21.3408	-21.3408	-21.3408	-21.3408	-21.3408	-21.3408	-21.3408	-21.3408	-21.3408	-21.3408	-21.3408	-21.3408	-21.3408	-21.3408	-21.3408
		-13.1185	-14.339	-15.4055	-16.3057	-16.7844	-17.5493	-18.2214	-18.5091	-19.7901	-20.0132	-21.3995	-20.3009	-21.3995	-20.7063	-20.7063	-21.3995	-21.3995	-21.3995	-21.3995	-21.3995	-21.3995	-21.3995	-21.3995	-21.3995	-21.3995	-21.3995	-21.3995
		-12.9707	-13.8172	-14.4465	-14.9939	-15.5499	-16.0001	-16.5704	-17.0324	-17.8525	-18.4279	-19.0847	-20.6251	-20.3374	-21.0306	-21.0306	-21.7237	-21.7237	-21.7237	-21.7237	-21.7237	-21.7237	-21.7237	-21.7237	-21.7237	-21.7237	-21.7237	-21.7237
		-13.6957	-14.952	-15.7668	-16.5404	-17.489	-18.0561	-19.1288	-19.7478	-20.3074	-21.0006	-21.0006	-21.6937	-21.6937	-21.6937	-21.6937	-21.6937	-21.6937	-21.6937	-21.6937	-21.0006	-21.6937	-21.6937	-21.6937	-21.6937	-21.6937	-21.6937	-21.6937
		-12.8267	-13.7184	-14.4137	-15.0654	-15.6562	-16.2416	-16.7311	-17.2929	-17.7297	-18.5229	-18.9024	-20.081	-20.3687	-20.3687	-21.4673	-21.4673	-21.4673	-21.4673	-21.4673	-21.4673	-21.4673	-21.4673	-21.4673	-21.4673	-21.4673	-21.4673	-21.4673
		-13.7216	-15.2743	-16.2992	-17.0188	-17.6942	-18.7928	-19.1723	-20.6387	-20.6387	-21.7373	-21.0441	-21.7373	-21.7373	-21.7373	-21.7373	-21.7373	-21.7373	-21.7373	-21.7373	-21.7373	-21.7373	-21.7373	-21.7373	-21.7373	-21.7373	-21.7373	-21.7373
		-14.1308	-15.6273	-16.5093	-17.2243	-17.8573	-18.3408	-19.7545	-19.1185	-20.3422	-21.2585	-20.8531	-21.9517	-20.1599	-21.9517	-21.9517	-21.9517	-21.9517	-21.9517	-21.9517	-21.9517	-21.9517	-21.9517	-21.9517	-21.9517	-21.9517	-21.9517	-21.9517
		-13.3232	-14.645	-15.651	-16.4146	-17.1757	-17.8688	-19.3887	-20.236	-20.236	-21.3346	-21.3346	-21.3346	-21.3346	-21.3346	-21.3346	-21.3346	-21.3346	-21.3346	-21.3346	-21.3346	-21.3346	-21.3346	-21.3346	-21.3346	-21.3346	-21.3346	-21.3346
		-13.5619	-14.915	-15.907	-16.5174	-17.5261	-18.1268	-19.0141	-19.3506	-21.6532	-20.9601	-21.6532	-21.6532	-21.6532	-21.6532	-21.6532	-21.6532	-21.6532	-21.6532	-21.6532	-21.6532	-21.6532	-21.6532	-21.6532	-21.6532	-21.6532	-21.6532	-21.6532
		-12.9653	-14.5944	-15.7349	-16.6241	-17.6199	-18.2463	-19.8886	-19.3777	-20.294	-21.6803	-21.6803	-21.6803	-21.6803	-21.6803	-21.6803	-21.6803	-21.6803	-21.6803	-21.6803	-21.6803	-21.6803	-21.6803	-21.6803	-21.6803	-21.6803	-21.6803	-21.6803
		-13.014	-14.244	-15.109	-15.8912	-16.7522	-17.3193	-17.5725	-18.5146	-18.8775	-19.1652	-20.5514	-20.5514	-20.9569	-21.6501	-21.6501	-21.6501	-21.6501	-21.6501	-21.6501	-21.6501	-21.6501	-21.6501	-21.6501	-21.6501	-21.6501	-21.6501	-21.6501
		-13.6627	-15.2343	-16.3139	-17.1997	-17.9182	-18.4037	-19.0968	-19.79	-20.8886	-20.8886	-21.5817	-21.5817	-21.5817	-21.5817	-21.5817	-21.5817	-21.5817	-21.5817	-21.5817	-21.5817	-21.5817	-21.5817	-21.5817	-21.5817	-21.5817	-21.5817	-21.5817
		-13.0522	-14.3336	-15.1027	-15.711	-16.3083	-16.6898	-17.491	-17.8964	-18.7614	-19.0491	-20.8409	-20.8409	-21.534	-21.534	-21.534	-21.534	-21.534	-21.534	-21.534	-21.534	-21.534	-21.534	-21.534	-21.534	-21.534	-21.534	-21.534
		-13.2319	-14.6691	-15.6167	-16.5841	-17.3991	-18.4437	-19.1909	-19.7787	-20.695	-20.695	-21.3881	-20.695	-21.3881	-21.3881	-21.3881	-21.3881	-21.3881	-21.3881	-21.3881	-21.3881	-21.3881	-21.3881	-21.3881	-21.3881	-21.3881	-21.3881	-21.3881
		-12.8543	-14.1962	-15.1011	-15.9468	-16.5001	-17.0237	-17.7496	-18.3374	-18.9914	-20.17	-20.4577	-20.8632	-21.5563	-21.5563	-21.5563	-21.5563	-21.5563	-21.5563	-21.5563	-21.5563	-21.5563	-21.5563	-21.5563	-21.5563	-21.5563	-21.5563	-21.5563
		-13.6539	-15.3032	-16.2921	-17.057	-17.6784	-18.6339	-19.1448	-19.7734	-20.7542	-21.1597	-21.8528	-21.8528	-21.8528	-21.8528	-21.8528	-21.8528	-21.8528	-21.8528	-21.8528	-21.8528	-21.8528	-21.8528	-21.8528	-21.8528	-21.8528	-21.8528	-21.8528
		-12.7866	-13.8671	-14.6297	-15.2068	-15.9209	-16.4191	-17.1262	-18.0216	-18.991	-19.5972	-20.2903	-21.3889	-21.3889	-21.3889	-21.3889	-21.3889	-21.3889	-21.3889	-21.3889	-21.3889	-21.3889	-21.3889	-21.3889	-21.3889	-21.3889	-21.3889	-21.3889
		-13.2189	-14.3544	-15.6015	-16.4338	-17.1128	-17.957	-18.0245	-19.7062	-21.0925	-20.6871	-21.7857	-21.7857	-21.7857	-21.7857	-21.7857	-21.7857	-21.7857	-21.7857	-21.7857	-21.7857	-21.7857	-21.7857	-21.7857	-21.7857	-21.7857	-21.7857	-21.7857
		-13.718	-14.7671	-16.0929	-16.7502	-17.3976	-18.3441	-19.2043	-19.5228	-20.9091	-20.2159	-21.6022	-21.6022	-21.6022	-21.6022	-21.6022	-21.6022	-21.6022	-21.6022	-21.6022	-21.6022	-21.6022	-21.6022	-21.6022	-21.6022	-21.6022	-21.6022	-21.6022
		-12.6457	-14.4476	-15.5538	-16.315	-16.9794	-17.4997	-18.5073	-19.1579	-19.5634	-21.6428	-20.5442	-21.6428	-20.9497	-21.6428	-21.6428	-21.6428	-21.6428	-21.6428	-21.6428	-21.6428	-21.6428	-21.6428	-21.6428	-21.6428	-21.6428	-21.6428	-21.6428
		-13.782	-15.2507	-16.2539	-16.947	-17.5066	-18.4303	-19.3282	-20.1167	-21.033	-20.6275	-21.7261	-21.033	-21.7261	-21.7261	-21.7261	-21.7261	-21.7261	-21.7261	-21.7261	-21.7261	-21.7261	-21.7261	-21.7261	-21.7261	-21.7261	-21.7261	-21.7261
		-13.5644	-15.1257	-16.0817	-16.6951	-17.4581	-18.2335	-19.3039	-20.1794	-20.6902	-20.6902	-21.7888	-21.7888	-21.7888	-21.7888	-21.7888	-21.7888	-21.7888	-21.7888	-21.7888	-21.7888	-21.7888	-21.7888	-21.7888	-21.7888	-21.7888	-21.7888	-21.7888
		-12.6522	-13.8186	-14.5518	-15.1865	-15.6803	-16.2452	-16.7581	-17.644	-18.0006	-18.8479	-19.5411	-19.9465	-21.3328	-20.2342	-21.3328	-21.3328	-21.3328	-21.3328	-21.3328	-21.3328	-21.3328	-21.3328	-21.3328	-21.3328	-21.3328	-21.3328	-21.3328
		-12.6698	-13.3643	-13.8813	-14.3987	-14.8975	-15.3439	-15.8968	-16.3307	-16.8976	-17.5574	-18.2671	-18.8351	-19.3657	-19.8765	-21.6683	-21.6683	-20.9751	-21.6683	-21.6683	-21.6683	-21.6683	-21.6683	-21.6683	-20.9751	-21.6683	-21.6683	-21.6683
		-12.6165	-13.7746	-14.5935	-15.2335	-16.0318	-16.5666	-17.2887	-18.176	-18.3302	-18.9433	-19.1103	-20.122	-21.5082	-21.5082	-21.5082	-21.5082	-21.5082	-21.5082	-21.5082	-21.5082	-21.5082	-21.5082	-21.5082	-21.5082	-21.5082	-21.5082	-21.5082
		-13.5059	-14.7428	-15.6719	-16.2977	-16.9208	-17.9668	-18.6859	-19.6845	-20.5318	-20.5318	-21.6304	-21.6304	-21.6304	-21.6304	-21.6304	-21.6304	-21.6304	-21.6304	-21.6304	-21.6304	-21.6304	-21.6304	-21.6304	-21.6304	-21.6304	-21.6304	-21.6304
		-14.4619	-15.5184	-16.3521	-17.1739	-18.1612	-18.9656	-19.8529	-20.4125	-21.1057	-21.1057	-21.7988	-21.7988	-21.7988	-21.1057	-21.7988	-21.7988	-21.7988	-21.7988	-21.7988	-21.7988	-21.7988	-21.7988	-21.7988	-21.7988	-21.7988	-21.7988	-21.7988
		-13.2789	-14.5226	-15.3354	-15.9876	-16.4938	-17.4575	-17.7153	-18.8745	-19.0822	-20.5485	-20.2608	-20.954	-20.954	-21.6471	-21.6471	-21.6471	-21.6471	-21.6471	-21.6471	-21.6471	-21.6471	-21.6471	-21.6471	-21.6471	-21.6471	-21.6471	-21.6471
		-13.4371	-14.6188	-15.4629	-16.0355	-16.7168	-17.2983	-18.4699	-18.7884	-19.4815	-19.4815	-19.9515	-20.4624	-21.561	-21.561	-21.561	-21.561	-21.561	-21.561	-21.561	-21.561	-21.561	-21.561	-21.561	-21.561	-21.561	-21.561	-21.561
		-13.3487	-14.7271	-15.7203	-16.467	-17.1549	-18.1639	-18.6747	-19.2343	-19.9275	-20.3329	-21.7192	-21.7192	-21.7192	-21.7192	-21.7192	-21.7192	-21.7192	-21.7192	-21.7192	-21.7192	-21.7192	-21.7192	-21.7192	-21.7192	-21.7192	-21.7192	-21.7192
		-13.5954	-14.8697	-15.7087	-16.1734	-17.0233	-17.5674	-18.2453	-18.5637	-19.1768	-19.6623	-21.0486	-21.7418	-21.7418	-21.0486	-21.7418	-21.7418	-21.7418	-21.7418	-21.7418	-21.7418	-21.7418	-21.7418	-21.7418	-21.7418	-21.7418	-21.7418	-21.7418
		-13.7505	-14.9475	-15.7632	-16.2449	-16.9058	-17.7908	-18.3748	-19.1771	-20.1326	-20.1326	-21.7421	-21.0489	-21.7421	-21.7421	-21.7421	-21.7421	-21.7421	-21.7421	-21.7421	-21.7421	-21.7421	-21.7421	-21.7421	-21.7421	-21.7421	-21.7421	-21.7421
		-13.1126	-14.3948	-15.1884	-15.8019	-16.2137	-17.1514	-17.7636	-17.9593	-18.737	-19.373	-19.373	-20.8771	-21.5702	-20.8771	-21.5702	-21.5702	-21.5702	-21.5702	-21.5702	-21.5702	-21.5702	-21.5702	-21.5702	-21.5702	-21.5702	-21.5702	-21.5702
		-13.2307	-14.5354	-15.4006	-16.3491	-16.6929	-17.6709	-18.1592	-18.6825	-18.6825	-19.8456	-20.7619	-21.4551	-21.4551	-21.4551	-21.4551	-21.4551	-20.7619	-21.4551	-21.4551	-21.4551	-20.7619	-21.4551	-21.4551	-21.4551	-21.4551	-21.4551	-21.4551
